# Supplementary material for: Agricultural activities and risk of treatment for depressive disorders among the entire French agricultural workforce: the TRACTOR project, a nationwide retrospective cohort study
Source: PubMed Central journal article supplement (PMC10318497; doi:10.1016/j.lanepe.2023.100674), 2023-06-26
Supplement: mmc1.pdf [file mmc1.pdf]

## Supplemental material

### Title

Agricultural activities and risk of treatment for depression depressive disorders among the entire French agricultural workforce: the TRACTOR project, a nationwide retrospective cohort study

### Authors

Pascal Petit, Gérald Gandon, Marc Dubuc, Nicolas Vuillerme, Vincent Bonneterre

### Table of contents

|                                                                                                                                                                 |    |
|-----------------------------------------------------------------------------------------------------------------------------------------------------------------|----|
| <b>Fig. S1:</b> Decision rule to consider depression as potentially work-related .....                                                                          | 2  |
| <b>Fig.S2:</b> Pareto chart of the number of farm managers per number of ATD prescriptions .....                                                                | 3  |
| <b>Fig. S3:</b> Number of farm managers with a depression identified with LTI declaration or antidepressant prescription .....                                  | 4  |
| <b>Fig. S4:</b> Number of farm managers prescribed with antidepressants per agent .....                                                                         | 5  |
| <b>Fig. S5:</b> Number of antidepressant agents prescribed to farm managers .....                                                                               | 6  |
| <b>Table S1:</b> List and definition of agricultural activities available using MSA databases .....                                                             | 7  |
| <b>Table S2:</b> Agricultural activities and risks of depression, TRACTOR, France, 2002-2016 – Results for each algorithm for the main analysis .....           | 8  |
| <b>Table S3:</b> Results of the interaction tests regarding the sex .....                                                                                       | 8  |
| <b>Table S4:</b> Agricultural activities and risks of depression, TRACTOR, France, 2002-2016 - results from the sensitivity analysis 1 .....                    | 9  |
| <b>Table S5:</b> Agricultural activities and risks of depression, TRACTOR, France, 2002-2016 - results from the sensitivity analysis 2 .....                    | 10 |
| <b>Table S6:</b> Agricultural activities and risks of depression, TRACTOR, France, 2002-2016 - results from the sensitivity analysis 3 .....                    | 11 |
| <b>Table S7:</b> Agricultural activities and risks of depression, TRACTOR, France, 2002-2016 - results from the sensitivity analysis 4 restricted to SSRIs..... | 12 |
| <b>STROBE Statement Checklist</b> .....                                                                                                                         | 13 |

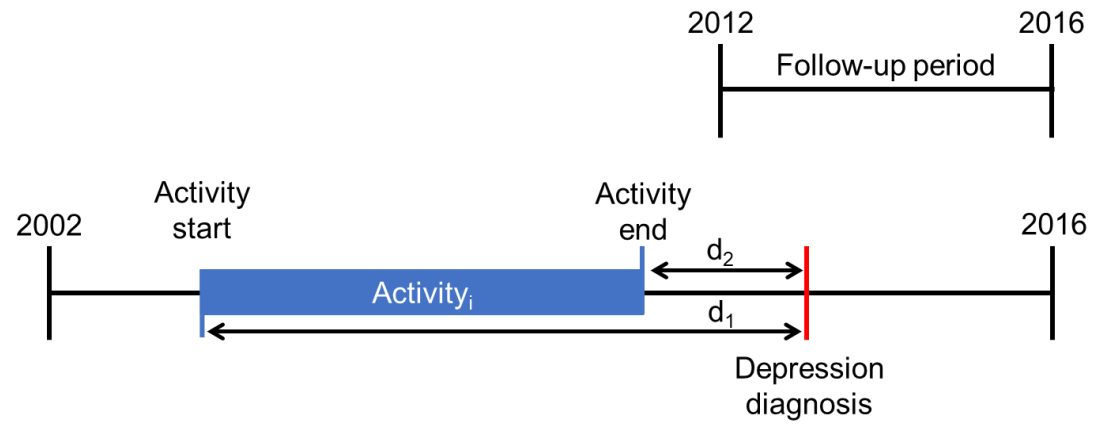

**Depression considered as work-related if:**

- $d_1 > 0$  year and  $d_2 \leq 2$  years  $\rightarrow$  for the main analysis, and sensitivity analyses 1, 3 and 4
- $d_1 > 0$  year  $\rightarrow$  for sensitivity analysis 2

**Fig. S1: Decision rule to consider depression as potentially work-related**

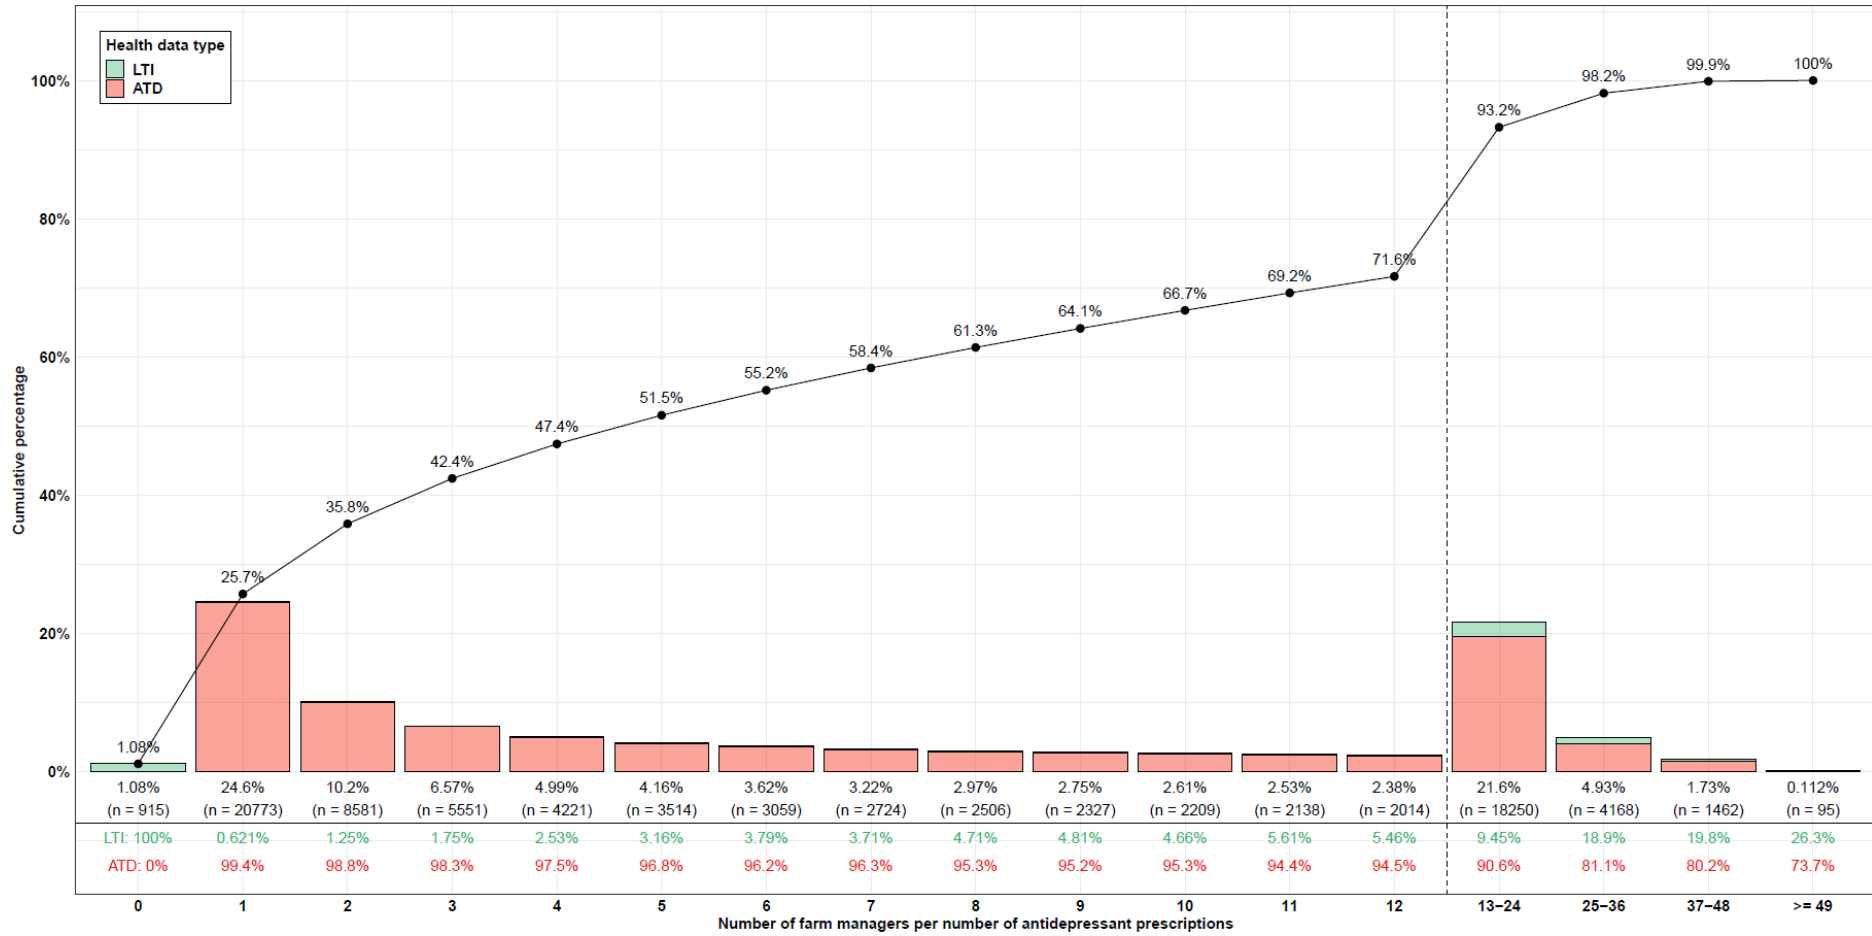

**Fig.S2: Pareto chart of the number of farm managers per number of ATD prescriptions**

ATD: antidepressant, LTI: long-term illness.

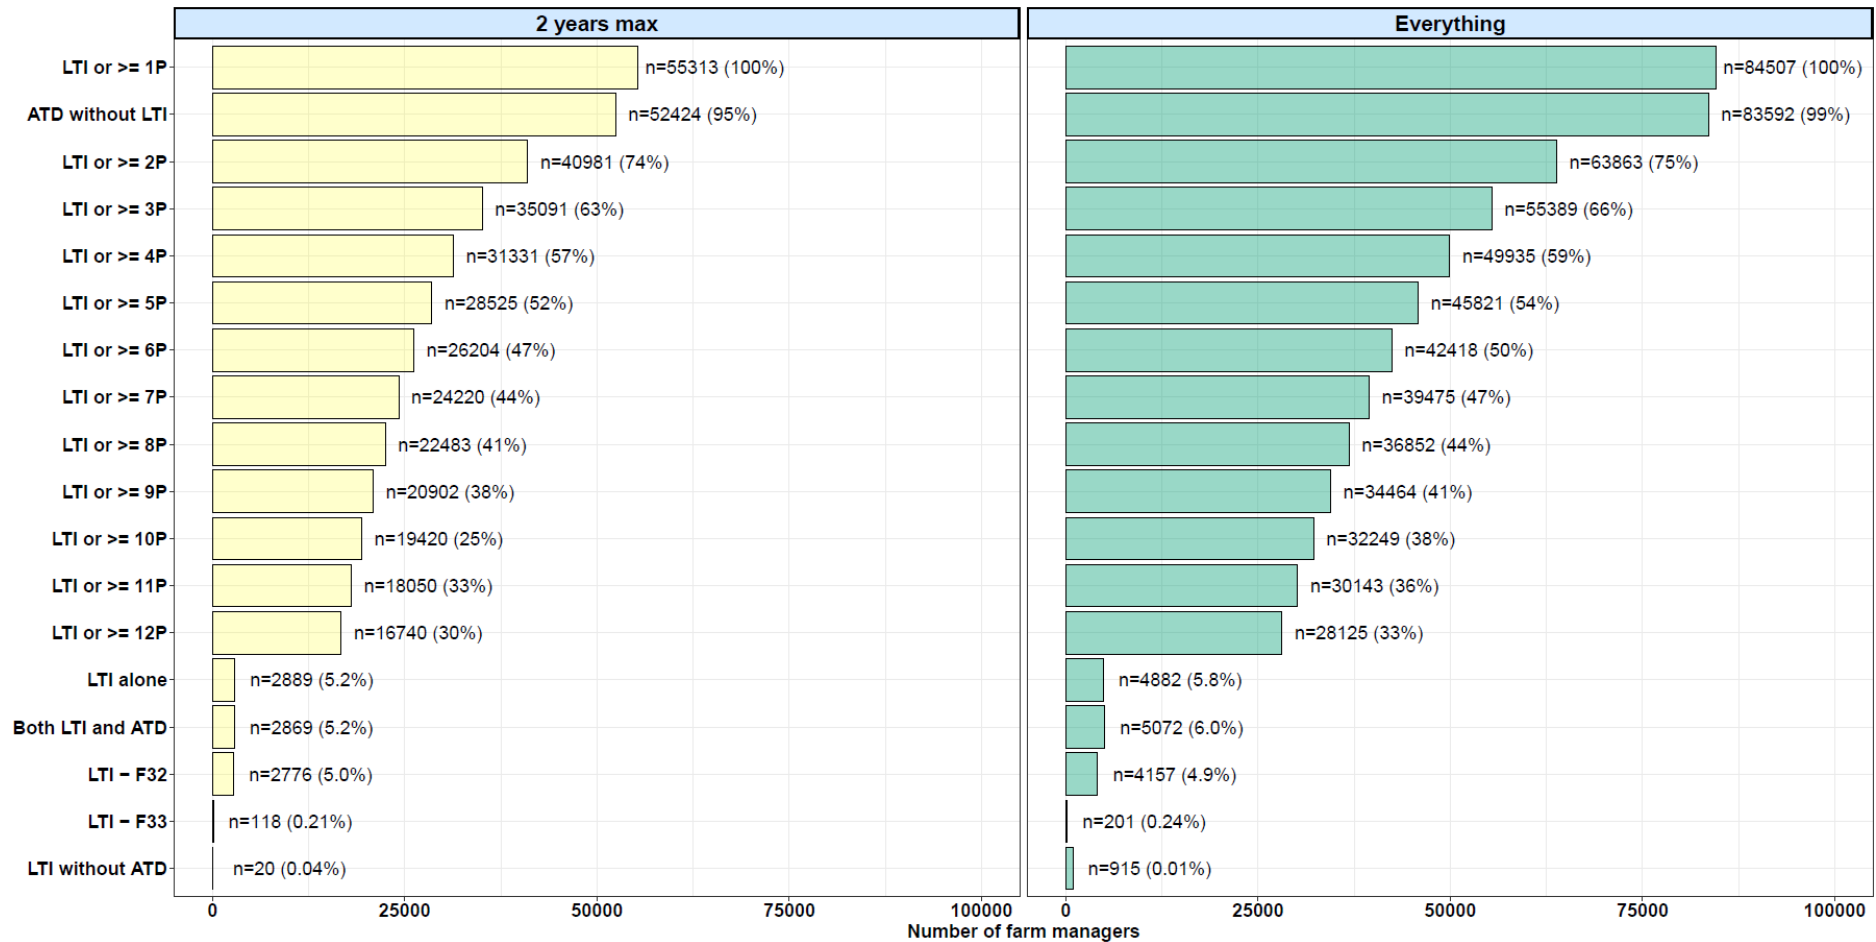

**Fig. S3: Number of farm managers with a depression identified with LTI declaration or antidepressant prescription**

ATD: antidepressant, F32: insurance declaration for depressive episode, F33: insurance declaration for major depressive disorder, recurrent, LTI: long term illness insurance declaration for depression, P: antidepressant prescription.

*2 years max*: The yellow bars refer to farm managers that were considered as depression cases for the main analysis, for which a restriction of time was applied to consider depression as work-related. Indeed; Only farm managers that had a depression insurance declaration or antidepressant prescription claim after the start of their activity, but no more than two years after the end of their activity were considered as depression cases.

*Everything*: The green bars refer to farm managers that were considered as depression for the sensitivity analysis, for which no restriction of time was applied to consider depression as work-related.

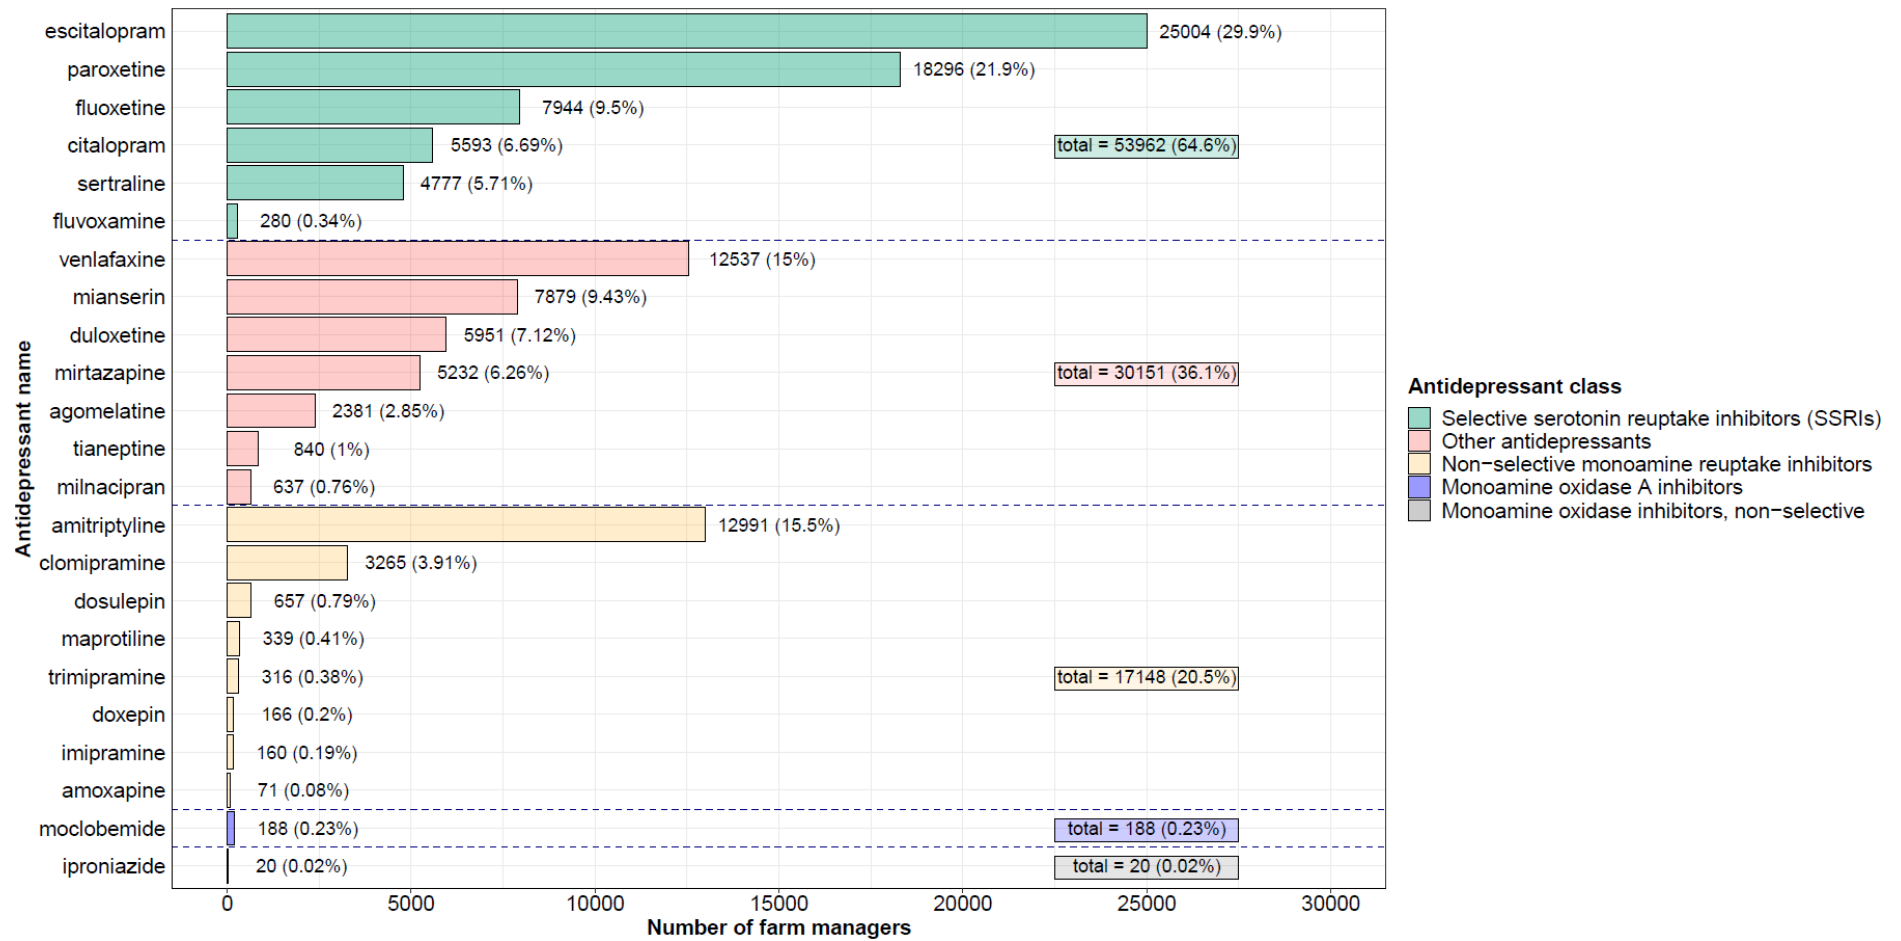

**Fig. S4: Number of farm managers prescribed with antidepressants per agent**

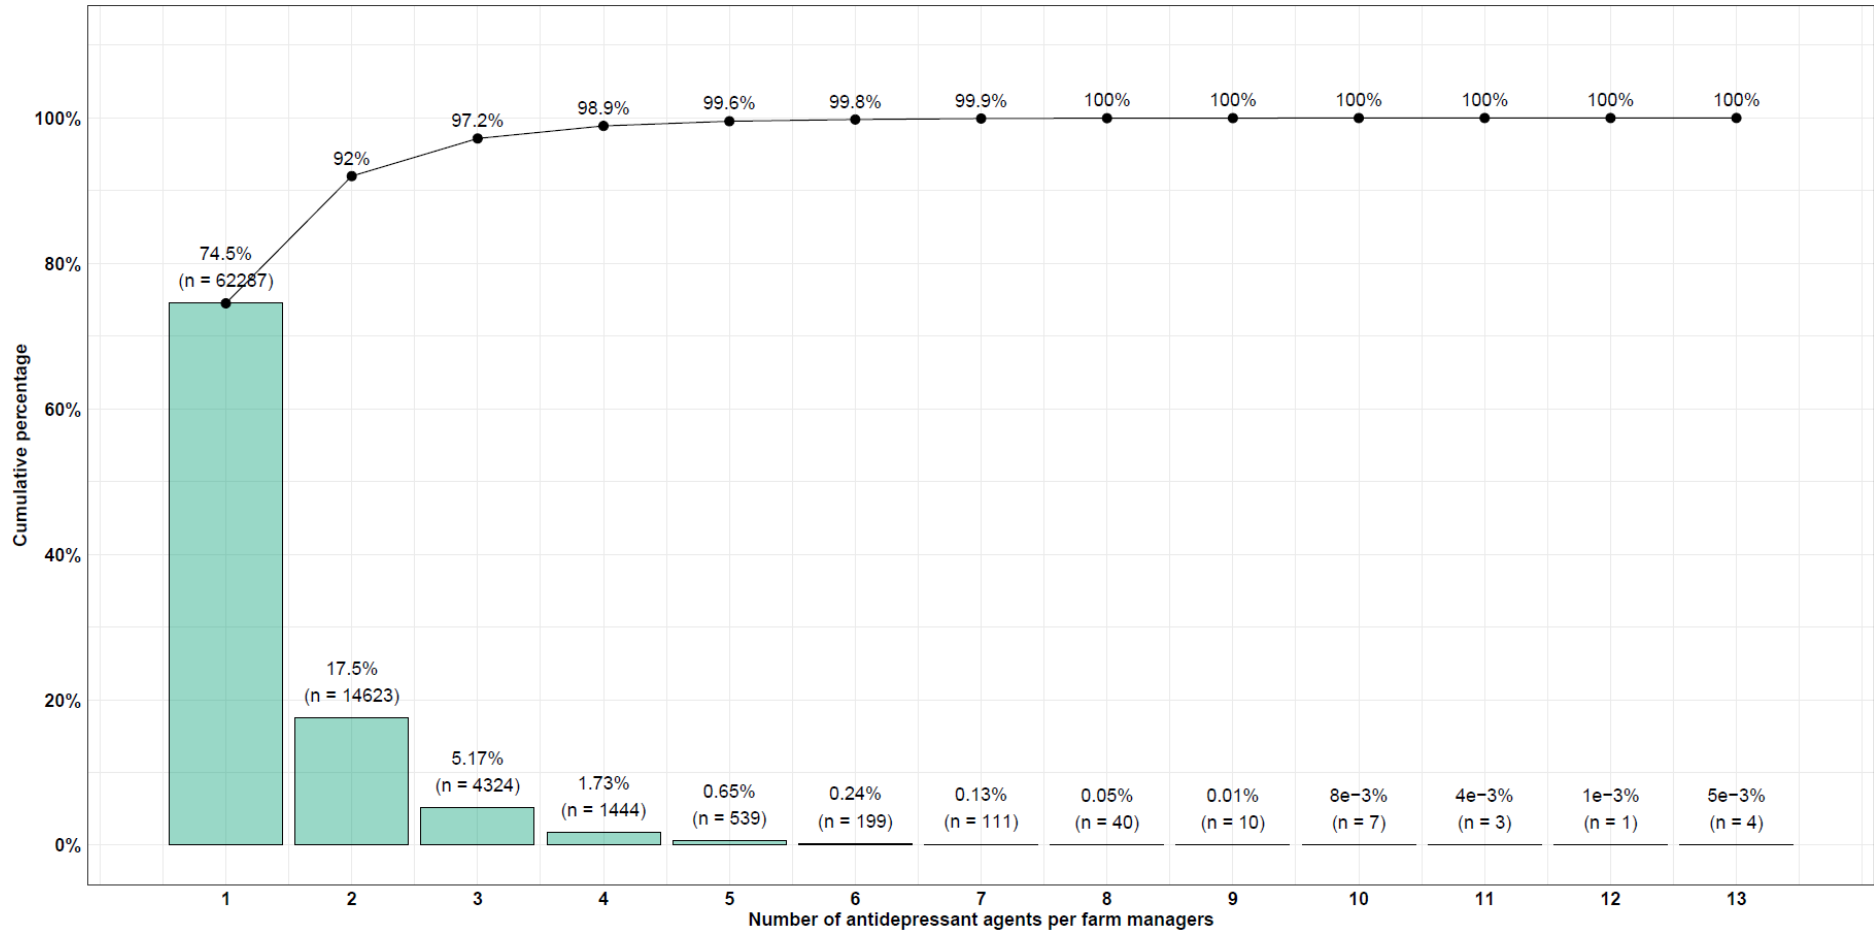

**Fig. S5: Number of antidepressant agents prescribed to farm managers**

**Table S1: List and definition of agricultural activities available using MSA databases**

| Activity name                                                                         | Definition                                                                                                                                                                                                                    | Example of task                                                                                                                                                                                                               |
|---------------------------------------------------------------------------------------|-------------------------------------------------------------------------------------------------------------------------------------------------------------------------------------------------------------------------------|-------------------------------------------------------------------------------------------------------------------------------------------------------------------------------------------------------------------------------|
| Truck farming, floriculture/flower-growing                                            | Practice of growing and harvesting fruits, vegetables, and flowers for sale                                                                                                                                                   | Proper crop selection, soil and water management, pest and disease management, harvesting and post-harvest handling                                                                                                           |
| Fruit arboriculture                                                                   | Cultivation of fruits growing on trees                                                                                                                                                                                        | Pruning branches, removing damaged or diseased branches, fertilizing trees, monitoring and controlling pests and diseases                                                                                                     |
| Garden center/tree nursery                                                            | Propagation, breeding and growing of plants and trees to a desired size                                                                                                                                                       | Planting, watering, weeding, digging, using tools such as sieve, or spade                                                                                                                                                     |
| Crop farming (e.g., wheat, corn, and industrial grower)                               | Cultivation of plants (e.g. cereals, vegetables) for food                                                                                                                                                                     | Monitoring and controlling pests and diseases, fertilizing, harvesting and post-harvest handling, grading, soil and water management, tractor driving                                                                         |
| Viticulture                                                                           | Cultivation and harvesting of grapes, and winemaking                                                                                                                                                                          | Monitoring and controlling pests and diseases, fertilizing, soil and water management, canopy management, monitoring fruit development and characteristics, harvesting and post-harvest handling, vine pruning                |
| Sylviculture/forestry (e.g., thinning, pruning)                                       | Controlling the growth, composition/structure, as well as quality of forests                                                                                                                                                  | Thinning, pruning, spacing                                                                                                                                                                                                    |
| Unspecified specialized farming (e.g., herbs, mushrooms)                              | Cultivation and harvesting of herbs, spices, medical plants, and mushrooms                                                                                                                                                    | Layering, cutting, grafting, pruning, mulching, weed management                                                                                                                                                               |
| Dairy farming                                                                         | Raising and breeding of domestic cows for milk production                                                                                                                                                                     | Breeding, milking (manually, or using machine), feeding, bulk handling, disease prevention, managing waste                                                                                                                    |
| Cow farming                                                                           | Raising and breeding of domestic cows as livestock                                                                                                                                                                            | Feeding, maintaining facilities, monitoring the herd for signs of illness, assisting with calving, performing artificial insemination, and managing waste                                                                     |
| Both/mixed dairy and cow farming                                                      | Raising and breeding of domestic cows as livestock and for milk production                                                                                                                                                    | Breeding, milking, feeding, bulk handling, disease prevention                                                                                                                                                                 |
| Ovine and caprine farming                                                             | Raising and breeding of domestic sheep and goats                                                                                                                                                                              | Breeding, milking, wool production, maintenance of the property, mustering, milking, shearing and drenching livestock, sterilizing machines, and collecting, grading and packaging produce                                    |
| Pig farming                                                                           | Raising and breeding of domestic pigs as livestock                                                                                                                                                                            | Maintain equipment and buildings, spread manure, feeding, monitoring the pigs for signs of illness, assist in artificial insemination, transporting stock to farms or processing plants                                       |
| Stud farming                                                                          | Raising and breeding of domestic horses                                                                                                                                                                                       | Feeding, breeding, assist in artificial insemination, disease prevention                                                                                                                                                      |
| Unspecified large animal farming (e.g., ostrich, llama)                               | Raising and breeding of large animals such as wild animals, ostrich, bison, boar, or llama                                                                                                                                    | Feeding, breeding, disease prevention                                                                                                                                                                                         |
| Poultry and rabbit farming                                                            | Raising and breeding of domestic birds and rabbits                                                                                                                                                                            | Feeding, breeding, disease prevention, assist in artificial insemination, gathering eggs, cleaning rooms and equipment/facility maintenance                                                                                   |
| Unspecified small animal farming (e.g., frogs, snails, bees)                          | Raising and breeding of small animals such as frogs, bees, insects, minks, beavers, or snails                                                                                                                                 | Feeding, breeding, disease prevention                                                                                                                                                                                         |
| Training, dressage, riding clubs                                                      | Activity including training and dressage of domestic equines                                                                                                                                                                  | Feeding, disease prevention, teaching, maintenance of the property, tourism                                                                                                                                                   |
| Shellfish farming (e.g., oyster farming, scallop aquaculture)                         | Cultivation and harvest of aquatic invertebrates, such as oysters, clams and mussels                                                                                                                                          | Breeding, rearing, harvesting, using a rack, processing, and shipment                                                                                                                                                         |
| Unspecified and mixed farming (e.g., polyculture, mixed farming, diversified farming) | Activity involving both the growing of crops and the raising of livestock, or the growing of more than one crop species                                                                                                       | Planning and coordinating the production and marketing of crops and livestock, breeding and raising livestock for the production of meat, wool, skins, milk or eggs, and growing grain, seed crops, vegetables, fruit or nuts |
| Salt works/salt evaporation pond                                                      | Production of salt from sea water                                                                                                                                                                                             | Harvesting, filtering                                                                                                                                                                                                         |
| Wood production (e.g., lopping)                                                       | Harvesting of round wood (trunk and branch wood) from coniferous (softwood) and non-coniferous (hardwood) trees                                                                                                               | Harvesting, lopping, transport                                                                                                                                                                                                |
| Stationary sawmill (e.g., edging, trimming, decking, debarking)                       | Cutting logs into lumber using large bandsaw blades                                                                                                                                                                           | Edging, trimming, decking, debarking, use of machines                                                                                                                                                                         |
| Agricultural work companies (e.g., pesticide applications, harvest reaping)           | Companies that assist or perform farm works such as harvest reaping                                                                                                                                                           | Harvest reaping, harrowing, sowing seeds, pesticide application, tilling, clearing                                                                                                                                            |
| Gardening, landscaping and reforestation companies                                    | Companies that perform gardening, landscaping and reforestation works                                                                                                                                                         | Gardening, landscaping, chainsaw and skidder operation, climbing on trees, monitoring and controlling pests and diseases                                                                                                      |
| Company representative/authorized representative                                      | Self-employed insurance broker responsible for representing a legal entity (agricultural insurance company)                                                                                                                   | Traveling, administrative tasks, visiting farms                                                                                                                                                                               |
| Rural craftserson (e.g., mason, mechanics)                                            | Self-employed person performing construction or hand-crafted works in rural areas, including jobs such as well-diggers, painters, electricians, masons, carpenters, saddlers, blacksmiths, mechanics, wheelwright or farriers | Fixing agricultural machinery, painting, welding, hammering                                                                                                                                                                   |

**Table S2:** Agricultural activities and risks of depression, TRACTOR, France, 2002-2016 – Results for each algorithm for the main analysis

Please refer to the SM Excel file entitled Table S2.

**Table S3:** Results of the interaction tests regarding the sex

| Activity                                                                              | Main analysis |          | SA 1  |        | SA 2  |          | SA 3  |          | SA 4  |        |
|---------------------------------------------------------------------------------------|---------------|----------|-------|--------|-------|----------|-------|----------|-------|--------|
|                                                                                       | d             | p        | d     | p      | d     | p        | d     | p        | d     | p      |
| Truck farming, floriculture/flower-growing                                            | F > M         | 0.09     | F > M | 0.07   | M > F | 0.11     | F > M | < 0.0001 | F > M | 0.16   |
| Fruit arboriculture                                                                   | M > F         | 0.17     | M > F | 0.09   | F > M | < 0.0001 | M > F | 0.12     | M > F | 0.22   |
| Garden center/tree nursery                                                            | M > F         | 0.32     | F > M | 0.37   | F > M | 0.03     | F > M | 0.40     | F > M | 0.26   |
| Crop farming (e.g., wheat, corn, and industrial grower)                               | M > F         | 0.04     | M > F | 1.5e-3 | M > F | < 0.0001 | M > F | 1.2e-3   | M > F | 0.13   |
| Viticulture                                                                           | M > F         | 0.67     | M > F | 0.21   | M > F | < 0.0001 | M > F | 0.19     | M > F | 0.40   |
| Sylviculture/forestry (e.g., thinning, pruning)                                       | M > F         | 0.89     | M > F | 0.78   | F > M | 0.01     | M > F | 0.60     | F > M | 0.34   |
| Unspecified specialized farming (e.g., herbs, mushrooms)                              | M > F         | 0.67     | M > F | 0.76   | M > F | 0.02     | M > F | 0.72     | M > F | 0.47   |
| Dairy farming                                                                         | F > M         | 9.4e-3   | F > M | 0.05   | F > M | < 0.0001 | F > M | 5.5e-3   | F > M | 1.9e-3 |
| Cow farming                                                                           | F > M         | < 0.0001 | F > M | 9.8e-4 | F > M | 5.9e-4   | F > M | 6.6e-4   | F > M | 0.01   |
| Both/mixed dairy and cow farming                                                      | F > M         | 0.05     | F > M | 0.11   | M > F | 0.60     | F > M | 0.04     | F > M | 0.23   |
| Ovine and caprine farming                                                             | F > M         | 0.38     | F > M | 0.56   | M > F | 2.0e-4   | F > M | 0.70     | M > F | 0.48   |
| Pig farming                                                                           | F > M         | 0.03     | F > M | 0.04   | M > F | 0.12     | F > M | 0.03     | F > M | 0.28   |
| Stud farming                                                                          | M > F         | 0.39     | M > F | 0.38   | M > F | 0.55     | M > F | 0.71     | M > F | 0.72   |
| Training, dressage, riding clubs                                                      | M > F         | 0.03     | F > M | 0.02   | M > F | 0.04     | F > M | 0.07     | F > M | 0.05   |
| Unspecified large animal farming (e.g., ostrich, llama)                               | M > F         | 0.32     | M > F | 0.33   | F > M | 0.47     | F > M | 0.36     | F > M | 0.34   |
| Poultry and rabbit farming                                                            | F > M         | 0.47     | F > M | 0.59   | F > M | 4.5e-4   | F > M | 0.56     | F > M | 0.23   |
| Unspecified small animal farming (e.g., frogs, snails, bees)                          | M > F         | 2.1e-3   | M > F | 1.6e-3 | F > M | < 0.0001 | M > F | 9.0e-4   | M > F | 0.02   |
| Shellfish farming (e.g., oyster farming, scallop aquaculture)                         | F > M         | 0.78     | M > F | 0.83   | F > M | 0.10     | M > F | 0.53     | M > F | 0.81   |
| Unspecified and mixed farming (e.g., polyculture, mixed farming, diversified farming) | M > F         | 1.0e-4   | F > M | 2.2e-3 | F > M | 3.4e-3   | F > M | 3.0e-4   | F > M | 9.0e-3 |
| Salt works/salt evaporation pond                                                      | F > M         | 0.02     | M > F | 0.02   | F > M | < 0.0001 | M > F | 0.01     | M > F | 0.04   |
| Wood production (e.g., lopping)                                                       | F > M         | 0.03     | F > M | 0.04   | F > M | 0.49     | F > M | 0.04     | F > M | 0.10   |
| Stationary sawmill (e.g., edging, trimming, decking, debarking)                       | F > M         | 0.08     | F > M | 0.08   | F > M | 0.03     | F > M | 0.08     | F > M | 0.03   |
| Agricultural work companies (e.g., pesticide applications, harvest reaping)           | F > M         | 0.05     | F > M | 0.06   | M > F | 0.61     | F > M | 0.05     | M > F | 0.46   |
| Gardening, landscaping and reforestation companies                                    | M > F         | 3.2e-03  | F > M | 6.1e-3 | F > M | 0.24     | F > M | 0.01     | F > M | 5.4e-3 |
| Company representative/authorized representative                                      | M > F         | 0.74     | M > F | 0.73   | M > F | 0.72     | M > F | 0.73     | M > F | 0.55   |
| Rural craftsman (e.g., mason, mechanics)                                              | M > F         | 0.50     | M > F | 0.50   | M > F | 0.02     | M > F | 0.53     | M > F | 0.60   |

Note: d: difference direction, F > M: depression risk higher for females than males, M > F: depression risk higher for males than females, p: p-value, SA: sensitivity analysis. The main analysis adjusted for sex, age, first year of the farm's establishment, and the number of working years. The sensitivity analysis 1 included the same covariates as the main analysis, with the exception of the number of pre-existing comorbidities. The sensitivity analysis 2 adjusted on the same variables than the main analysis, but it was considered that depression cases could be work-related for all FMs that had a depression insurance declaration or ATD prescription claim, regardless of the date it occurred after the start of their activity (Fig. S1). The third sensitivity analysis adjusted on the same covariates than the main analysis in addition to other potential cofounders, that were selected based on the variance inflation factor (VIF) ( $VIF \leq 2.5$ ) to remove collinear variables. The fourth sensitivity analysis was restricted to selective serotonin reuptake inhibitors (SSRIs) (Table 1).



**Table S4:** Agricultural activities and risks of depression, TRACTOR, France, 2002-2016 - results from the sensitivity analysis 1

| Activity                                                                              | Both sexes (n=1088561) |            |                         |          |                    | Female (n=337263) |           |                         |          |                    | Male (n=751298) |           |                         |          |                    |
|---------------------------------------------------------------------------------------|------------------------|------------|-------------------------|----------|--------------------|-------------------|-----------|-------------------------|----------|--------------------|-----------------|-----------|-------------------------|----------|--------------------|
|                                                                                       | n (%)                  | m (range)  | HR                      | p        | p.adj              | n (%)             | m (range) | HR                      | p        | p.adj              | n (%)           | m (range) | HR                      | p        | p.adj              |
| Truck farming, floriculture/flower-growing                                            | 43487 (3.99)           | 80; 1855   | 1.08 [1.00-1.16]        | 0.10     | 0.13               | 13251 (3.93)      | 26; 728   | 1.12 [1.01-1.24]        | 0.10     | 0.12               | 30236 (4.02)    | 54; 1127  | 1.05 [0.95-1.18]        | 0.40     | 0.56               |
| Fruit arboriculture                                                                   | 25001 (2.3)            | 51; 1027   | 0.92 [0.83-1.02]        | 0.14     | 0.22               | 7927 (2.35)       | 21; 405   | <b>0.81 [0.69-0.96]</b> | 0.04     | <b>0.05</b>        | 17074 (2.27)    | 30; 622   | 1.00 [0.88-1.14]        | 0.81     | 0.96               |
| Garden center/tree nursery                                                            | 5380 (0.49)            | 11; 282    | 1.23 [1.01-1.51]        | 0.11     | 0.13               | 1419 (0.42)       | 4; 95     | 1.27 [0.93-1.79]        | 0.20     | 0.25               | 3961 (0.53)     | 7; 187    | 1.20 [0.94-1.56]        | 0.20     | 0.27               |
| Crop farming (e.g., wheat, corn, and industrial grower)                               | 316926 (29.1)          | 547; 10755 | <b>0.83 [0.80-0.85]</b> | < 0.0001 | <b>&lt; 0.0001</b> | 105642 (31.3)     | 261; 4272 | <b>0.80 [0.76-0.84]</b> | < 0.0001 | <b>&lt; 0.0001</b> | 211284 (28.1)   | 286; 6483 | <b>0.87 [0.84-0.91]</b> | < 0.0001 | <b>&lt; 0.0001</b> |
| Viticulture                                                                           | 121950 (11.2)          | 266; 6531  | 1.02 [0.98-1.06]        | 0.52     | 0.71               | 42909 (12.7)      | 112; 2825 | 0.99 [0.93-1.05]        | 0.50     | 0.74               | 79041 (10.5)    | 154; 3706 | 1.05 [1.00-1.11]        | 0.10     | 0.13               |
| Sylviculture/forestry (e.g., thinning, pruning)                                       | 2160 (0.2)             | 6; 80      | 1.31 [0.93-1.89]        | 0.17     | 0.24               | 359 (0.11)        | 4; 19     | 1.26 [0.68-2.35]        | 0.48     | 0.75               | 1801 (0.24)     | 2; 61     | 1.49 [1.01-2.22]        | 0.08     | 0.11               |
| Unspecified specialized farming (e.g., herbs, mushrooms)                              | 6615 (0.61)            | 22; 271    | <b>1.28 [1.07-1.53]</b> | 9.9e-3   | <b>0.01</b>        | 2408 (0.71)       | 11; 122   | 1.17 [0.90-1.52]        | 0.27     | 0.37               | 4207 (0.56)     | 11; 149   | <b>1.33 [1.04-1.73]</b> | 0.04     | <b>0.05</b>        |
| Dairy farming                                                                         | 161436 (14.8)          | 545; 9135  | <b>1.30 [1.25-1.35]</b> | < 0.0001 | <b>&lt; 0.0001</b> | 49659 (14.7)      | 228; 3615 | <b>1.33 [1.26-1.41]</b> | < 0.0001 | <b>&lt; 0.0001</b> | 111777 (14.9)   | 317; 5520 | <b>1.20 [1.14-1.26]</b> | < 0.0001 | <b>&lt; 0.0001</b> |
| Cow farming                                                                           | 111873 (10.3)          | 481; 6933  | <b>1.44 [1.38-1.49]</b> | < 0.0001 | <b>&lt; 0.0001</b> | 32904 (9.76)      | 203; 2840 | <b>1.55 [1.46-1.63]</b> | < 0.0001 | <b>&lt; 0.0001</b> | 78969 (10.5)    | 278; 4093 | <b>1.32 [1.26-1.39]</b> | < 0.0001 | <b>&lt; 0.0001</b> |
| Both/mixed dairy and cow farming                                                      | 31070 (2.85)           | 98; 1834   | <b>1.14 [1.06-1.23]</b> | 0.01     | <b>0.01</b>        | 8084 (2.4)        | 37; 646   | <b>1.24 [1.10-1.40]</b> | 0.02     | <b>0.02</b>        | 22986 (3.06)    | 61; 1188  | 1.04 [0.95-1.15]        | 0.42     | 0.64               |
| Ovine and caprine farming                                                             | 48716 (4.48)           | 150; 2327  | 1.05 [0.99-1.12]        | 0.17     | 0.24               | 17314 (5.13)      | 70; 1093  | 1.06 [0.97-1.17]        | 0.31     | 0.42               | 31402 (4.18)    | 80; 1234  | 1.04 [0.96-1.14]        | 0.39     | 0.58               |
| Pig farming                                                                           | 13636 (1.25)           | 42; 845    | <b>1.21 [1.08-1.35]</b> | 0.02     | <b>0.02</b>        | 3890 (1.15)       | 20; 345   | <b>1.42 [1.20-1.69]</b> | 4.1e-3   | <b>4.2e-3</b>      | 9746 (1.3)      | 22; 500   | 1.06 [0.92-1.22]        | 0.39     | 0.62               |
| Stud farming                                                                          | 17164 (1.58)           | 33; 671    | 1.00 [0.87-1.15]        | 0.53     | 0.79               | 7408 (2.2)        | 20; 402   | 0.93 [0.78-1.12]        | 0.41     | 0.60               | 9756 (1.3)      | 13; 269   | 1.12 [0.91-1.39]        | 0.34     | 0.50               |
| Unspecified large animal farming (e.g., ostrich, llama)                               | 14874 (1.37)           | 19; 742    | 0.95 [0.81-1.11]        | 0.36     | 0.46               | 6619 (1.96)       | 9; 411    | 0.95 [0.79-1.16]        | 0.39     | 0.52               | 8255 (1.1)      | 10; 331   | 0.94 [0.75-1.20]        | 0.49     | 0.74               |
| Poultry and rabbit farming                                                            | 2997 (0.28)            | 5; 149     | <b>1.83 [1.44-2.36]</b> | 0.02     | <b>0.02</b>        | 1437 (0.43)       | 3; 93     | <b>1.64 [1.20-2.27]</b> | 0.03     | <b>0.03</b>        | 1560 (0.21)     | 2; 56     | <b>1.85 [1.24-2.77]</b> | 0.04     | <b>0.04</b>        |
| Unspecified small animal farming (e.g., frogs, snails, bees)                          | 25540 (2.35)           | 81; 1620   | <b>1.30 [1.20-1.42]</b> | 1.3e-3   | <b>1.4e-3</b>      | 9995 (2.96)       | 39; 824   | <b>1.33 [1.19-1.50]</b> | 0.01     | <b>0.01</b>        | 15545 (2.07)    | 42; 796   | <b>1.28 [1.14-1.45]</b> | 5.4e-3   | <b>5.9e-3</b>      |
| Training, dressage, riding clubs                                                      | 19896 (1.83)           | 31; 614    | <b>0.81 [0.70-0.94]</b> | 0.03     | <b>0.04</b>        | 8596 (2.55)       | 10; 277   | <b>0.55 [0.44-0.69]</b> | 1.3e-3   | <b>1.4e-3</b>      | 11300 (1.5)     | 21; 337   | 1.13 [0.95-1.35]        | 0.19     | 0.30               |
| Shellfish farming (e.g., oyster farming, scallop aquaculture)                         | 3795 (0.35)            | 7; 159     | 1.33 [1.02-1.74]        | 0.08     | 0.10               | 725 (0.22)        | 2; 45     | 1.25 [0.82-1.92]        | 0.34     | 0.52               | 3070 (0.41)     | 5; 114    | <b>1.54 [1.13-2.14]</b> | 0.03     | <b>0.04</b>        |
| Unspecified and mixed farming (e.g., polyculture, mixed farming, diversified farming) | 127900 (11.7)          | 346; 6690  | <b>1.21 [1.17-1.26]</b> | 1.4e-3   | <b>1.5e-3</b>      | 39338 (11.7)      | 144; 2679 | <b>1.26 [1.19-1.34]</b> | 4.2e-3   | <b>4.3e-3</b>      | 88562 (11.8)    | 202; 4011 | <b>1.13 [1.07-1.20]</b> | 0.01     | <b>0.01</b>        |
| Salt works/salt evaporation pond                                                      | 974 (0.09)             | 2; 40      | 0.89 [0.55-1.45]        | 0.65     | 0.90               | 221 (22.7)        | 0; 3      | <b>0.36 [0.15-0.94]</b> | 0.04     | <b>0.04</b>        | 753 (0.1)       | 2; 34     | 1.35 [0.82-2.25]        | 0.25     | 0.38               |
| Wood production (e.g., lopping)                                                       | 11385 (1.05)           | 13; 504    | 1.08 [0.91-1.29]        | 0.37     | 0.50               | 297 (0.09)        | 0; 22     | <b>1.99 [1.10-3.61]</b> | 0.03     | <b>0.05</b>        | 11088 (1.48)    | 13; 482   | 1.11 [0.93-1.34]        | 0.26     | 0.36               |
| Stationary sawmill (e.g., edging, trimming, decking, debarking)                       | 787 (0.07)             | 3; 45      | 1.52 [0.95-2.54]        | 0.18     | 0.23               | 52 (0.02)         | 0; 52     | <b>3.13 [1.26-8.02]</b> | 0.04     | <b>0.05</b>        | 735 (0.1)       | 3; 37     | 1.37 [0.82-2.38]        | 0.33     | 0.45               |
| Agricultural work companies (e.g., pesticide applications, harvest reaping)           | 15557 (1.43)           | 20; 656    | 1.12 [0.97-1.31]        | 0.18     | 0.23               | 1866 (0.55)       | 3; 107    | 1.33 [0.98-1.84]        | 0.09     | 0.12               | 13691 (1.82)    | 17; 549   | 1.11 [0.94-1.33]        | 0.29     | 0.36               |
| Gardening, landscaping and reforestation companies                                    | 48878 (4.49)           | 76; 2309   | <b>1.26 [1.15-1.38]</b> | 0.02     | <b>0.02</b>        | 2531 (0.75)       | 9; 169    | <b>1.55 [1.19-2.04]</b> | 0.02     | <b>0.02</b>        | 46347 (6.17)    | 67; 2140  | <b>1.43 [1.31-1.57]</b> | 5.1e-3   | <b>5.1e-3</b>      |
| Company representative/authorized representative                                      | 1931 (0.18)            | 2; 42      | 0.85 [0.56-1.30]        | 0.46     | 0.70               | 1496 (0.44)       | 1; 35     | 0.80 [0.51-1.26]        | 0.34     | 0.53               | 437 (0.06)      | 1; 7      | 1.15 [0.41-3.32]        | 0.74     | 0.96               |
| Rural craftsman (e.g., mason, mechanics)                                              | 7701 (0.71)            | 0; 5       | <b>0.03 [0.01-0.07]</b> | < 0.0001 | <b>&lt; 0.0001</b> | 283 (0.08)        | 0         | NC                      | NC       | NC                 | 7418 (0.99)     | 0; 5      | <b>0.03 [0.01-0.08]</b> | < 0.0001 | <b>&lt; 0.0001</b> |

Note: HR: hazard ratio, n: number of exposed farm managers, m: range of the number of exposed depression cases, NC: not calculated, p: p-value, p.adj: p-value adjusted using the Benjamini-Hochberg approach. Hazard ratios were estimated by Cox models with time to first depression insurance declaration or first antidepressant prescription as the underlying timescale, when the number of exposed cases was sufficient (m ≥ 3), adjusted for sex (both sexes only), age, first year of the farm's establishment, and the number of working years. Results for females and males were obtained with subgroup analysis (one separate model for each sex).

**Table S5:** Agricultural activities and risks of depression, TRACTOR, France, 2002-2016 - results from the sensitivity analysis 2

| Activity                                                                                    | Both sexes<br>(n=1088561) |             |                         |          |                    | Female<br>(n=337263) |            |                         |          |               | Male<br>(n=751298) |            |                         |          |                    |
|---------------------------------------------------------------------------------------------|---------------------------|-------------|-------------------------|----------|--------------------|----------------------|------------|-------------------------|----------|---------------|--------------------|------------|-------------------------|----------|--------------------|
|                                                                                             | n (%)                     | m (range)   | HR                      | p        | p.adj              | n (%)                | m (range)  | HR                      | p        | p.adj         | n (%)              | m (range)  | HR                      | p        | p.adj              |
| Truck farming, floriculture/<br>flower-growing                                              | 43487 (3.99)              | 177; 3336   | 1.13 [1.06-1.20]        | 0.05     | 0.08               | 13251 (3.93)         | 77; 1385   | 1.08 [0.83-1.43]        | 0.11     | 0.24          | 30236 (4.02)       | 100; 1951  | 1.14 [1.05-1.24]        | 0.03     | 0.06               |
| Fruit arboriculture                                                                         | 25001 (2.3)               | 103; 1743   | 0.95 [0.88-1.02]        | 0.25     | 0.31               | 7927 (2.35)          | 51; 759    | 1.00 [0.62-1.62]        | 0.29     | 0.48          | 17074 (2.27)       | 52; 984    | 0.93 [0.79-1.39]        | 0.26     | 0.29               |
| Garden center/tree nursery                                                                  | 5380 (0.49)               | 21; 450     | 1.09 [0.93-1.28]        | 0.36     | 0.41               | 1419 (0.42)          | 7; 154     | 1.34 [0.73-2.54]        | 0.36     | 0.48          | 3961 (0.53)        | 14; 296    | 1.06 [0.97-1.43]        | 0.06     | 0.09               |
| Crop farming (e.g., wheat, corn, and<br>industrial grower)                                  | 316926 (29.1)             | 1309; 22822 | 1.10 [1.08-1.13]        | 0.03     | 0.07               | 105642 (31.3)        | 719; 10953 | 1.05 [0.89-1.25]        | 0.14     | 0.28          | 211284 (28.1)      | 590; 11869 | 1.06 [1.03-1.10]        | 0.03     | 0.06               |
| Viticulture                                                                                 | 121950 (11.2)             | 489; 10497  | <b>1.28 [1.21-1.34]</b> | 3.2e-3   | <b>0.01</b>        | 42909 (12.7)         | 240; 4918  | 1.01 [0.79-1.28]        | 0.27     | 0.48          | 79041 (10.5)       | 249; 5579  | <b>1.15 [1.08-1.24]</b> | 1.6e-3   | <b>0.01</b>        |
| Sylviculture/forestry (e.g., thinning,<br>pruning)                                          | 2160 (0.2)                | 12; 145     | 1.15 [0.90-1.46]        | 0.19     | 0.25               | 359 (0.11)           | 8; 45      | 1.75 [0.68-4.49]        | 0.61     | 0.63          | 1801 (0.24)        | 4; 100     | 1.11 [0.79-1.58]        | 0.31     | 0.34               |
| Unspecified specialized farming (e.g.,<br>herbs, mushrooms)                                 | 6615 (0.61)               | 31; 422     | 1.04 [0.89-1.20]        | 0.45     | 0.49               | 2408 (0.71)          | 16; 181    | 0.90 [0.40-2.14]        | 0.43     | 0.49          | 4207 (0.56)        | 15; 241    | 1.14 [0.92-1.41]        | 0.16     | 0.21               |
| Dairy farming                                                                               | 161436 (14.8)             | 1009; 15000 | <b>1.37 [1.33-1.41]</b> | < 0.0001 | <b>&lt; 0.0001</b> | 49659 (14.7)         | 486; 6669  | <b>1.40 [1.26-1.56]</b> | < 0.0001 | <b>6.0e-4</b> | 111777 (14.9)      | 523; 8331  | <b>1.29 [1.24-1.34]</b> | < 0.0001 | <b>1.0e-3</b>      |
| Cow farming                                                                                 | 111873 (10.3)             | 780; 10327  | <b>1.17 [1.14-1.21]</b> | 1.2e-4   | <b>6.4e-4</b>      | 32904 (9.76)         | 386; 4521  | <b>1.13 [1.08-1.32]</b> | 1.2e-3   | <b>0.01</b>   | 78969 (10.5)       | 394; 5806  | <b>1.16 [1.11-1.21]</b> | 3.2e-3   | <b>0.01</b>        |
| Both/mixed dairy and cow farming                                                            | 31070 (2.85)              | 175; 2837   | <b>1.14 [1.08-1.19]</b> | 1.3e-3   | <b>4.8e-3</b>      | 8084 (2.4)           | 73; 1103   | <b>1.11 [1.06-1.49]</b> | 3.5e-3   | <b>0.02</b>   | 22986 (3.06)       | 102; 1734  | <b>1.14 [1.09-1.26]</b> | 6.7e-3   | <b>0.02</b>        |
| Ovine and caprine farming                                                                   | 48716 (4.48)              | 267; 3545   | 1.02 [0.97-1.07]        | 0.06     | 0.10               | 17314 (5.13)         | 131; 1742  | 0.90 [0.59-1.37]        | 0.35     | 0.48          | 31402 (4.18)       | 136; 1803  | 1.04 [0.97-1.12]        | 0.06     | 0.09               |
| Pig farming                                                                                 | 13636 (1.25)              | 72; 1239    | <b>1.15 [1.05-1.25]</b> | 0.03     | <b>0.05</b>        | 3890 (1.15)          | 40; 530    | 0.79 [0.54-1.19]        | 0.39     | 0.48          | 9746 (1.3)         | 32; 709    | <b>1.18 [1.06-1.31]</b> | 0.02     | <b>0.05</b>        |
| Stud farming                                                                                | 17164 (1.58)              | 50; 920     | <b>0.74 [0.65-0.83]</b> | < 0.0001 | <b>4.8e-4</b>      | 7408 (2.2)           | 33; 531    | 0.70 [0.42-1.09]        | 0.08     | 0.19          | 9756 (1.3)         | 17; 389    | <b>0.75 [0.63-0.90]</b> | 2.5e-3   | <b>0.01</b>        |
| Training, dressage, riding clubs                                                            | 14874 (1.37)              | 29; 969     | 0.79 [0.69-0.91]        | 0.03     | 0.06               | 6619 (1.96)          | 13; 516    | 0.64 [0.37-1.05]        | 0.06     | 0.16          | 8255 (1.1)         | 16; 453    | <b>0.78 [0.66-0.95]</b> | 9.6e-3   | <b>0.03</b>        |
| Unspecified large animal farming (e.g.,<br>ostrich, llama)                                  | 2997 (0.28)               | 8; 208      | 1.26 [1.01-1.58]        | 0.05     | 0.08               | 1437 (0.43)          | 5; 122     | <b>1.28 [1.09-1.65]</b> | 9.8e-3   | <b>0.05</b>   | 1560 (0.21)        | 3; 86      | 1.21 [0.88-1.86]        | 0.23     | 0.27               |
| Poultry and rabbit farming                                                                  | 25540 (2.35)              | 148; 2391   | <b>1.26 [1.18-1.35]</b> | 3.5e-4   | <b>1.5e-3</b>      | 9995 (2.96)          | 77; 1247   | 1.47 [1.01-2.66]        | 0.04     | 0.12          | 15545 (2.07)       | 71; 1144   | <b>1.23 [1.12-1.34]</b> | 1.4e-3   | <b>0.01</b>        |
| Unspecified small animal farming<br>(e.g., frogs, snails, bees)                             | 19896 (1.83)              | 56; 897     | <b>1.53 [1.42-1.65]</b> | < 0.0001 | <b>&lt; 0.0001</b> | 8596 (2.55)          | 23; 416    | 1.38 [0.57-3.44]        | 0.34     | 0.48          | 11300 (1.5)        | 33; 481    | 1.14 [0.97-1.40]        | 0.06     | 0.09               |
| Shellfish farming (e.g. oyster farming,<br>scallop aquaculture)                             | 3795 (0.35)               | 10; 251     | 1.12 [0.91-1.40]        | 0.15     | 0.22               | 725 (0.22)           | 3; 70      | 1.34 [0.69-2.51]        | 0.45     | 0.49          | 3070 (0.41)        | 7; 181     | 1.25 [0.97-1.64]        | 0.07     | 0.10               |
| Unspecified and mixed farming (e.g.,<br>polyculture, mixed farming, diversified<br>farming) | 127900 (11.7)             | 604; 10223  | 0.99 [0.95-1.02]        | 0.18     | 0.25               | 39338 (11.7)         | 289; 4456  | 1.25 [1.02-2.32]        | 0.03     | 0.10          | 88562 (11.8)       | 315; 5767  | 1.01 [0.94-1.05]        | 0.08     | 0.11               |
| Salt works/salt evaporation pond                                                            | 974 (0.09)                | 2; 50       | 0.97 [0.63-1.52]        | 0.51     | 0.53               | 221 (22.7)           | 0; 9       | 1.07 [0.65-1.77]        | 0.39     | 0.48          | 753 (0.1)          | 2; 41      | 0.87 [0.53-1.33]        | 0.35     | 0.36               |
| Wood production (e.g., lopping)                                                             | 11385 (1.05)              | 27; 721     | 1.05 [0.91-1.21]        | 0.26     | 0.31               | 297 (0.09)           | 2; 35      | 1.13 [0.56-2.37]        | 0.42     | 0.49          | 11088 (1.48)       | 25; 686    | 1.05 [0.90-1.23]        | 0.19     | 0.24               |
| Stationary sawmill (e.g., edging,<br>trimming, decking, debarking)                          | 787 (0.07)                | 3; 61       | 1.16 [0.77-1.82]        | 0.62     | 0.62               | 52 (0.02)            | 0; 9       | 1.46 [1.04-6.23]        | 0.02     | 0.09          | 735 (0.1)          | 3; 52      | 1.07 [0.67-1.78]        | 0.37     | 0.37               |
| Agricultural work companies (e.g.,<br>pesticide applications, harvest reaping)              | 15557 (1.43)              | 51; 1081    | 1.25 [1.11-1.40]        | 0.02     | 0.06               | 1866 (0.55)          | 14; 199    | 0.92 [0.57-1.51]        | 0.38     | 0.48          | 13691 (1.82)       | 37; 882    | 1.19 [1.05-1.36]        | 0.03     | 0.06               |
| Gardening, landscaping and<br>reforestation companies                                       | 48878 (4.49)              | 120; 3036   | 1.12 [1.03-1.23]        | 0.04     | 0.07               | 2531 (0.75)          | 16; 238    | 1.21 [1.04-1.63]        | 0.03     | 0.10          | 46347 (6.17)       | 104; 2798  | <b>1.17 [1.07-1.28]</b> | 0.01     | <b>0.03</b>        |
| Company representative/<br>authorized representative                                        | 1931 (0.18)               | 9; 148      | <b>1.64 [1.29-2.12]</b> | 6.7e-3   | <b>0.02</b>        | 1496 (0.44)          | 7; 122     | 1.47 [0.75-3.87]        | 0.78     | 0.78          | 437 (0.06)         | 2; 26      | <b>2.08 [1.19-3.67]</b> | 8.4e-3   | <b>0.03</b>        |
| Rural craftsman (e.g., mason,<br>mechanics)                                                 | 7701 (0.71)               | 0; 28       | <b>0.05 [0.03-0.10]</b> | < 0.0001 | <b>&lt; 0.0001</b> | 283 (0.08)           | 0          | NC                      | NC       | NC            | 7418 (0.99)        | 0; 24      | <b>0.04 [0.02-0.08]</b> | < 0.0001 | <b>&lt; 0.0001</b> |

Note: HR: hazard ratio, n: number of exposed farm managers, m: range of the number of exposed depression cases, NC: not calculated, p: p-value, p.adj: p-value adjusted using the Benjamini-Hochberg approach. Hazard ratios were estimated by Cox models with time to first depression insurance declaration or first antidepressant prescription as the underlying timescale, when the number of exposed cases was sufficient ( $m \geq 3$ ), adjusted for sex (both sexes only), age, first year of the farm's establishment, the number of working years, and the number of pre-existing comorbidities. Results for females and males were obtained with subgroup analysis (one separate model for each sex).

**Table S6:** Agricultural activities and risks of depression, TRACTOR, France, 2002-2016 - results from the sensitivity analysis 3

| Activity                                                                                    | Both sexes<br>(n=1088561) |            |                         |          |                    | Female<br>(n=337263) |           |                         |          |                    | Male<br>(n=751298) |           |                         |          |                    |
|---------------------------------------------------------------------------------------------|---------------------------|------------|-------------------------|----------|--------------------|----------------------|-----------|-------------------------|----------|--------------------|--------------------|-----------|-------------------------|----------|--------------------|
|                                                                                             | n (%)                     | m (range)  | HR                      | p        | p.adj              | n (%)                | m (range) | HR                      | p        | p.adj              | n (%)              | m (range) | HR                      | p        | p.adj              |
| Truck farming, floriculture/<br>flower-growing                                              | 43487 (3.99)              | 80; 1855   | <b>0.75 [0.69-0.81]</b> | < 0.0001 | <b>&lt; 0.0001</b> | 13251 (3.93)         | 26; 728   | <b>0.87 [0.78-0.97]</b> | 0.02     | <b>0.03</b>        | 30236 (4.02)       | 54; 1127  | <b>0.67 [0.61-0.75]</b> | 3.3e-3   | <b>3.3e-3</b>      |
| Fruit arboriculture                                                                         | 25001 (2.3)               | 51; 1027   | 0.93 [0.84-1.03]        | 0.20     | 0.32               | 7927 (2.35)          | 21; 405   | 0.83 [0.71-0.99]        | 0.08     | 0.10               | 17074 (2.27)       | 30; 622   | 1.00 [0.88-1.14]        | 0.81     | 0.99               |
| Garden center/tree nursery                                                                  | 5380 (0.49)               | 11; 282    | 1.24 [1.02-1.53]        | 0.10     | 0.12               | 1419 (0.42)          | 4; 95     | 1.32 [0.96-1.85]        | 0.16     | 0.19               | 3961 (0.53)        | 7; 187    | 1.20 [0.94-1.56]        | 0.20     | 0.28               |
| Crop farming (e.g., wheat, corn, and<br>industrial grower)                                  | 316926 (29.1)             | 547; 10755 | <b>0.82 [0.80-0.85]</b> | < 0.0001 | <b>&lt; 0.0001</b> | 105642 (31.3)        | 261; 4272 | <b>0.76 [0.72-0.81]</b> | < 0.0001 | <b>&lt; 0.0001</b> | 211284 (28.1)      | 286; 6483 | <b>0.87 [0.84-0.91]</b> | < 0.0001 | <b>&lt; 0.0001</b> |
| Viticulture                                                                                 | 121950 (11.2)             | 266; 6531  | 1.02 [0.98-1.06]        | 0.41     | 0.54               | 42909 (12.7)         | 112; 2825 | 0.99 [0.94-1.05]        | 0.56     | 0.79               | 79041 (10.5)       | 154; 3706 | 1.05 [0.99-1.11]        | 0.13     | 0.17               |
| Sylviculture/forestry (e.g., thinning,<br>pruning)                                          | 2160 (0.2)                | 6; 80      | 1.37 [0.97-1.98]        | 0.12     | 0.17               | 359 (0.11)           | 4; 19     | 1.18 [0.64-2.21]        | 0.59     | 0.92               | 1801 (0.24)        | 2; 61     | 1.50 [1.01-2.22]        | 0.09     | 0.11               |
| Unspecified specialized farming (e.g.,<br>herbs, mushrooms)                                 | 6615 (0.61)               | 22; 271    | <b>1.32 [1.10-1.57]</b> | 4.4e-3   | <b>6.3e-3</b>      | 2408 (0.71)          | 11; 122   | 1.28 [0.99-1.67]        | 0.08     | 0.12               | 4207 (0.56)        | 11; 149   | <b>1.34 [1.04-1.73]</b> | 0.03     | <b>0.05</b>        |
| Dairy farming                                                                               | 161436 (14.8)             | 545; 9135  | <b>1.27 [1.23-1.32]</b> | < 0.0001 | <b>&lt; 0.0001</b> | 49659 (14.7)         | 228; 3615 | <b>1.33 [1.26-1.41]</b> | < 0.0001 | <b>&lt; 0.0001</b> | 111777 (14.9)      | 317; 5520 | <b>1.22 [1.16-1.28]</b> | < 0.0001 | <b>&lt; 0.0001</b> |
| Cow farming                                                                                 | 111873 (10.3)             | 481; 6933  | <b>1.41 [1.36-1.47]</b> | < 0.0001 | <b>&lt; 0.0001</b> | 32904 (9.76)         | 203; 2840 | <b>1.48 [1.40-1.56]</b> | < 0.0001 | <b>&lt; 0.0001</b> | 78969 (10.5)       | 278; 4093 | <b>1.34 [1.27-1.40]</b> | < 0.0001 | <b>&lt; 0.0001</b> |
| Both/mixed dairy and cow farming                                                            | 31070 (2.85)              | 98; 1834   | <b>1.10 [1.02-1.19]</b> | 0.03     | <b>0.04</b>        | 8084 (2.4)           | 37; 646   | <b>1.19 [1.05-1.34]</b> | 0.03     | <b>0.03</b>        | 22986 (3.06)       | 61; 1188  | 1.04 [0.94-1.15]        | 0.47     | 0.78               |
| Ovine and caprine farming                                                                   | 48716 (4.48)              | 150; 2327  | 1.04 [0.98-1.11]        | 0.23     | 0.34               | 17314 (5.13)         | 70; 1093  | 1.04 [0.95-1.15]        | 0.44     | 0.64               | 31402 (4.18)       | 80; 1234  | 1.04 [0.96-1.14]        | 0.40     | 0.58               |
| Pig farming                                                                                 | 13636 (1.25)              | 42; 845    | <b>1.17 [1.04-1.31]</b> | 0.04     | <b>0.04</b>        | 3890 (1.15)          | 20; 345   | <b>1.35 [1.14-1.61]</b> | 6.6e-3   | <b>6.9e-3</b>      | 9746 (1.3)         | 22; 500   | 1.05 [0.91-1.22]        | 0.43     | 0.69               |
| Stud farming                                                                                | 17164 (1.58)              | 33; 671    | 1.05 [0.91-1.21]        | 0.57     | 0.74               | 7408 (2.2)           | 20; 402   | 1.02 [0.85-1.22]        | 0.52     | 0.71               | 9756 (1.3)         | 13; 269   | 1.11 [0.90-1.40]        | 0.43     | 0.57               |
| Training, dressage, riding clubs                                                            | 14874 (1.37)              | 19; 742    | 0.98 [0.84-1.15]        | 0.39     | 0.49               | 6619 (1.96)          | 9; 411    | 1.05 [0.87-1.29]        | 0.42     | 0.51               | 8255 (1.1)         | 10; 331   | 0.93 [0.73-1.19]        | 0.43     | 0.59               |
| Unspecified large animal farming (e.g.,<br>ostrich, llama)                                  | 2997 (0.28)               | 5; 149     | <b>1.95 [1.52-2.51]</b> | 0.02     | <b>0.02</b>        | 1437 (0.43)          | 3; 93     | <b>1.90 [1.39-2.64]</b> | 0.02     | <b>0.02</b>        | 1560 (0.21)        | 2; 56     | <b>1.88 [1.28-2.80]</b> | 0.04     | <b>0.05</b>        |
| Poultry and rabbit farming                                                                  | 25540 (2.35)              | 81; 1620   | <b>1.29 [1.19-1.41]</b> | 1.5e-3   | <b>1.5e-3</b>      | 9995 (2.96)          | 39; 824   | <b>1.31 [1.17-1.47]</b> | 0.01     | <b>0.01</b>        | 15545 (2.07)       | 42; 796   | <b>1.28 [1.14-1.44]</b> | 5.4e-3   | <b>5.8e-3</b>      |
| Unspecified small animal farming<br>(e.g., frogs, snails, bees)                             | 19896 (1.83)              | 31; 614    | 0.88 [0.76-1.02]        | 0.18     | 0.22               | 8596 (2.55)          | 10; 277   | <b>0.65 [0.52-0.82]</b> | 7.3e-3   | <b>7.7e-3</b>      | 11300 (1.5)        | 21; 337   | 1.14 [0.95-1.36]        | 0.23     | 0.32               |
| Shellfish farming (e.g. oyster farming,<br>scallop aquaculture)                             | 3795 (0.35)               | 7; 159     | <b>1.43 [1.10-1.89]</b> | 0.05     | <b>0.05</b>        | 725 (0.22)           | 2; 45     | 1.29 [0.85-1.98]        | 0.29     | 0.43               | 3070 (0.41)        | 5; 114    | <b>1.55 [1.13-2.16]</b> | 0.04     | <b>0.05</b>        |
| Unspecified and mixed farming (e.g.,<br>polyculture, mixed farming, diversified<br>farming) | 127900 (11.7)             | 346; 6690  | <b>1.20 [1.15-1.24]</b> | 2.8e-3   | <b>2.8e-3</b>      | 39338 (11.7)         | 144; 2679 | <b>1.26 [1.19-1.34]</b> | 5.1e-3   | <b>5.1e-3</b>      | 88562 (11.8)       | 202; 4011 | <b>1.13 [1.07-1.20]</b> | 0.02     | <b>0.02</b>        |
| Salt works/salt evaporation pond                                                            | 974 (0.09)                | 2; 40      | 0.98 [0.61-1.60]        | 0.80     | 0.91               | 221 (22.7)           | 0; 3      | 0.43 [0.17-1.10]        | 0.08     | 0.11               | 753 (0.1)          | 2; 34     | 1.36 [0.82-2.25]        | 0.25     | 0.40               |
| Wood production (e.g., lopping)                                                             | 11385 (1.05)              | 13; 504    | 1.12 [0.94-1.34]        | 0.21     | 0.28               | 297 (0.09)           | 0; 22     | <b>2.21 [1.22-4.02]</b> | 0.01     | <b>0.02</b>        | 11088 (1.48)       | 13; 482   | 1.10 [0.92-1.33]        | 0.31     | 0.40               |
| Stationary sawmill (e.g., edging,<br>trimming, decking, debarking)                          | 787 (0.07)                | 3; 45      | 1.62 [1.01-2.71]        | 0.14     | 0.18               | 52 (0.02)            | 0; 52     | <b>3.64 [1.43-9.60]</b> | 0.02     | <b>0.03</b>        | 735 (0.1)          | 3; 37     | 1.38 [0.82-2.40]        | 0.34     | 0.45               |
| Agricultural work companies (e.g.,<br>pesticide applications, harvest reaping)              | 15557 (1.43)              | 20; 656    | 1.15 [0.99-1.35]        | 0.12     | 0.15               | 1866 (0.55)          | 3; 107    | <b>1.52 [1.12-2.09]</b> | 0.04     | <b>0.04</b>        | 13691 (1.82)       | 17; 549   | 1.10 [0.93-1.32]        | 0.34     | 0.42               |
| Gardening, landscaping and<br>reforestation companies                                       | 48878 (4.49)              | 76; 2309   | <b>1.36 [1.24-1.49]</b> | 7.8e-3   | <b>7.8e-3</b>      | 2531 (0.75)          | 9; 169    | <b>1.87 [1.42-2.49]</b> | 3.3e-3   | <b>3.3e-3</b>      | 46347 (6.17)       | 67; 2140  | <b>1.37 [1.25-1.51]</b> | 0.01     | <b>0.01</b>        |
| Company representative/<br>authorized representative                                        | 1931 (0.18)               | 2; 42      | 0.86 [0.57-1.31]        | 0.49     | 0.74               | 1496 (0.44)          | 1; 35     | 0.80 [0.51-1.27]        | 0.35     | 0.55               | 437 (0.06)         | 1; 7      | 1.17 [0.42-3.36]        | 0.73     | 0.99               |
| Rural craftsperson (e.g., mason,<br>mechanics)                                              | 7701 (0.71)               | 0; 5       | <b>0.03 [0.01-0.07]</b> | < 0.0001 | <b>&lt; 0.0001</b> | 283 (0.08)           | 0         | NC                      | NC       | NC                 | 7418 (0.99)        | 0; 5      | <b>0.03 [0.01-0.07]</b> | < 0.0001 | <b>&lt; 0.0001</b> |

Note: HR: hazard ratio, n: number of exposed farm managers, m: range of the number of exposed depression cases, NC: not calculated, p: p-value, p.adj: p-value adjusted using the Benjamini-Hochberg approach. Hazard ratios were estimated by Cox models with time to first depression insurance declaration or first antidepressant prescription as the underlying timescale, when the number of exposed cases was sufficient ( $m \geq 3$ ), adjusted for sex (both sexes only), age, first year of the farm's establishment, the number of working years, the number of pre-existing comorbidities, and on other potential covariates (Table 1). Results for females and males were obtained with subgroup analysis (one separate model for each sex).

**Table S7:** Agricultural activities and risks of depression, TRACTOR, France, 2002-2016 - results from the sensitivity analysis 4 restricted to SSRI

| Activity                                                                                    | Both sexes<br>(n=1088561) |            |                         |          |                    | Female<br>(n=337263) |           |                         |          |                    | Male<br>(n=751298) |           |                         |          |                    |
|---------------------------------------------------------------------------------------------|---------------------------|------------|-------------------------|----------|--------------------|----------------------|-----------|-------------------------|----------|--------------------|--------------------|-----------|-------------------------|----------|--------------------|
|                                                                                             | n (%)                     | m (range)  | HR                      | p        | p.adj              | n (%)                | m (range) | HR                      | p        | p.adj              | n (%)              | m (range) | HR                      | p        | p.adj              |
| Truck farming, floriculture/<br>flower-growing                                              | 43487 (3.99)              | 80; 1855   | 1.08 [0.98-1.18]        | 0.15     | 0.22               | 13251 (3.93)         | 26; 728   | 1.11 [0.98-1.27]        | 0.15     | 0.19               | 30236 (4.02)       | 54; 1127  | 1.05 [0.92-1.21]        | 0.51     | 0.63               |
| Fruit arboriculture                                                                         | 25001 (2.3)               | 51; 1027   | 1.00 [0.88-1.13]        | 0.67     | 0.94               | 7927 (2.35)          | 21; 405   | 0.87 [0.71-1.06]        | 0.21     | 0.30               | 17074 (2.27)       | 30; 622   | 1.09 [0.93-1.29]        | 0.28     | 0.43               |
| Garden center/tree nursery                                                                  | 5380 (0.49)               | 11; 282    | 1.25 [0.98-1.63]        | 0.13     | 0.16               | 1419 (0.42)          | 4; 95     | 1.39 [0.94-2.10]        | 0.12     | 0.17               | 3961 (0.53)        | 7; 187    | 1.17 [0.84-1.66]        | 0.42     | 0.60               |
| Crop farming (e.g., wheat, corn, and<br>industrial grower)                                  | 316926 (29.1)             | 547; 10755 | <b>0.89 [0.85-0.93]</b> | 4.4e-4   | <b>4.5e-4</b>      | 105642 (31.3)        | 261; 4272 | <b>0.88 [0.83-0.94]</b> | 0.03     | <b>0.03</b>        | 211284 (28.1)      | 286; 6483 | <b>0.93 [0.88-0.98]</b> | 0.02     | <b>0.03</b>        |
| Viticulture                                                                                 | 121950 (11.2)             | 266; 6531  | <b>1.10 [1.05-1.16]</b> | 1.5e-3   | <b>1.6e-3</b>      | 42909 (12.7)         | 112; 2825 | 1.05 [0.98-1.13]        | 0.20     | 0.27               | 79041 (10.5)       | 154; 3706 | <b>1.16 [1.08-1.24]</b> | 0.02     | <b>0.02</b>        |
| Sylviculture/forestry (e.g., thinning,<br>pruning)                                          | 2160 (0.2)                | 6; 80      | 1.46 [0.95-2.25]        | 0.13     | 0.18               | 359 (0.11)           | 4; 19     | 1.91 [0.99-3.71]        | 0.07     | 0.10               | 1801 (0.24)        | 2; 61     | 1.40 [0.82-2.41]        | 0.29     | 0.41               |
| Unspecified specialized farming (e.g.,<br>herbs, mushrooms)                                 | 6615 (0.61)               | 22; 271    | <b>1.45 [1.17-1.80]</b> | 1.1e-3   | <b>1.5e-3</b>      | 2408 (0.71)          | 11; 122   | 1.39 [1.03-1.89]        | 0.05     | 0.06               | 4207 (0.56)        | 11; 149   | <b>1.45 [1.06-1.99]</b> | 0.03     | <b>0.04</b>        |
| Dairy farming                                                                               | 161436 (14.8)             | 545; 9135  | <b>1.38 [1.32-1.44]</b> | < 0.0001 | <b>&lt; 0.0001</b> | 49659 (14.7)         | 228; 3615 | <b>1.45 [1.36-1.56]</b> | < 0.0001 | <b>&lt; 0.0001</b> | 111777 (14.9)      | 317; 5520 | <b>1.24 [1.17-1.32]</b> | < 0.0001 | <b>&lt; 0.0001</b> |
| Cow farming                                                                                 | 111873 (10.3)             | 481; 6933  | <b>1.53 [1.46-1.61]</b> | < 0.0001 | <b>&lt; 0.0001</b> | 32904 (9.76)         | 203; 2840 | <b>1.61 [1.50-1.73]</b> | < 0.0001 | <b>&lt; 0.0001</b> | 78969 (10.5)       | 278; 4093 | <b>1.44 [1.35-1.54]</b> | < 0.0001 | <b>&lt; 0.0001</b> |
| Both/mixed dairy and cow farming                                                            | 31070 (2.85)              | 98; 1834   | <b>1.20 [1.09-1.32]</b> | 8.9e-4   | <b>9.3e-4</b>      | 8084 (2.4)           | 37; 646   | <b>1.28 [1.11-1.50]</b> | 4.1e-3   | <b>4.5e-3</b>      | 22986 (3.06)       | 61; 1188  | 1.12 [0.99-1.26]        | 0.08     | 0.12               |
| Ovine and caprine farming                                                                   | 48716 (4.48)              | 150; 2327  | <b>1.14 [1.05-1.22]</b> | 2.0e-3   | <b>2.5e-3</b>      | 17314 (5.13)         | 70; 1093  | 1.12 [1.00-1.25]        | 0.07     | 0.09               | 31402 (4.18)       | 80; 1234  | <b>1.15 [1.03-1.28]</b> | 0.02     | <b>0.03</b>        |
| Pig farming                                                                                 | 13636 (1.25)              | 42; 845    | <b>1.28 [1.11-1.47]</b> | 8.6e-3   | <b>8.9e-3</b>      | 3890 (1.15)          | 20; 345   | <b>1.40 [1.14-1.72]</b> | 2.8e-3   | <b>3.5e-3</b>      | 9746 (1.3)         | 22; 500   | 1.17 [0.98-1.40]        | 0.14     | 0.18               |
| Stud farming                                                                                | 17164 (1.58)              | 33; 671    | 1.16 [0.98-1.37]        | 0.14     | 0.18               | 7408 (2.2)           | 20; 402   | 1.02 [0.83-1.27]        | 0.60     | 0.84               | 9756 (1.3)         | 13; 269   | <b>1.37 [1.07-1.76]</b> | 0.04     | <b>0.04</b>        |
| Training, dressage, riding clubs                                                            | 14874 (1.37)              | 19; 742    | 1.03 [0.86-1.24]        | 0.67     | 0.82               | 6619 (1.96)          | 9; 411    | 1.02 [0.81-1.29]        | 0.58     | 0.77               | 8255 (1.1)         | 10; 331   | 1.02 [0.78-1.37]        | 0.68     | 0.87               |
| Unspecified large animal farming (e.g.,<br>ostrich, llama)                                  | 2997 (0.28)               | 5; 149     | <b>1.80 [1.30-2.54]</b> | 0.03     | <b>0.03</b>        | 1437 (0.43)          | 3; 93     | 1.68 [1.14-2.52]        | 0.05     | 0.06               | 1560 (0.21)        | 2; 56     | 1.66 [0.95-2.96]        | 0.19     | 0.23               |
| Poultry and rabbit farming                                                                  | 25540 (2.35)              | 81; 1620   | <b>1.42 [1.29-1.57]</b> | < 0.0001 | <b>&lt; 0.0001</b> | 9995 (2.96)          | 39; 824   | <b>1.47 [1.29-1.69]</b> | 3.9e-3   | <b>3.9e-3</b>      | 15545 (2.07)       | 42; 796   | <b>1.35 [1.17-1.57]</b> | 2.7e-3   | <b>3.1e-3</b>      |
| Unspecified small animal farming<br>(e.g., frogs, snails, bees)                             | 19896 (1.83)              | 31; 614    | 0.89 [0.76-1.06]        | 0.25     | 0.36               | 8596 (2.55)          | 10; 277   | <b>0.61 [0.47-0.79]</b> | 4.1e-3   | <b>4.1e-3</b>      | 11300 (1.5)        | 21; 337   | 1.25 [1.01-1.55]        | 0.06     | 0.08               |
| Shellfish farming (e.g. oyster farming,<br>scallop aquaculture)                             | 3795 (0.35)               | 7; 159     | 1.40 [1.01-1.95]        | 0.06     | 0.08               | 725 (0.22)           | 2; 45     | 1.35 [0.80-2.27]        | 0.28     | 0.44               | 3070 (0.41)        | 5; 114    | <b>1.61 [1.08-2.44]</b> | 0.04     | <b>0.04</b>        |
| Unspecified and mixed farming (e.g.,<br>polyculture, mixed farming, diversified<br>farming) | 127900 (11.7)             | 346; 6690  | <b>1.29 [1.22-1.37]</b> | < 0.0001 | <b>&lt; 0.0001</b> | 39338 (11.7)         | 144; 2679 | <b>1.33 [1.23-1.44]</b> | < 0.0001 | <b>&lt; 0.0001</b> | 88562 (11.8)       | 202; 4011 | <b>1.22 [1.13-1.31]</b> | 2.0e-4   | <b>2.0e-4</b>      |
| Salt works/salt evaporation pond                                                            | 974 (0.09)                | 2; 40      | 1.22 [0.72-2.08]        | 0.49     | 0.69               | 221 (22.7)           | 0; 3      | 0.49 [0.18-1.34]        | 0.16     | 0.18               | 753 (0.1)          | 2; 34     | 1.87 [1.07-3.30]        | 0.03     | 0.06               |
| Wood production (e.g., lopping)                                                             | 11385 (1.05)              | 13; 504    | 1.05 [0.84-1.32]        | 0.61     | 0.84               | 297 (0.09)           | 0; 22     | 1.91 [0.88-4.21]        | 0.14     | 0.21               | 11088 (1.48)       | 13; 482   | 1.10 [0.87-1.40]        | 0.41     | 0.59               |
| Stationary sawmill (e.g., edging,<br>trimming, decking, debarking)                          | 787 (0.07)                | 3; 45      | 1.70 [0.97-3.14]        | 0.15     | 0.19               | 52 (0.02)            | 0; 52     | <b>4.63 [1.81-12.1]</b> | 5.3e-3   | <b>6.2e-3</b>      | 735 (0.1)          | 3; 37     | 1.39 [0.72-2.79]        | 0.43     | 0.57               |
| Agricultural work companies (e.g.,<br>pesticide applications, harvest reaping)              | 15557 (1.43)              | 20; 656    | 1.14 [0.94-1.38]        | 0.27     | 0.35               | 1866 (0.55)          | 3; 107    | 1.16 [0.76-1.83]        | 0.51     | 0.75               | 13691 (1.82)       | 17; 549   | 1.19 [0.97-1.47]        | 0.21     | 0.25               |
| Gardening, landscaping and<br>reforestation companies                                       | 48878 (4.49)              | 76; 2309   | <b>1.32 [1.19-1.48]</b> | 0.01     | <b>0.01</b>        | 2531 (0.75)          | 9; 169    | <b>1.72 [1.27-2.37]</b> | 0.01     | <b>0.01</b>        | 46347 (6.17)       | 67; 2140  | <b>1.50 [1.34-1.69]</b> | 2.5e-3   | <b>2.5e-3</b>      |
| Company representative/<br>authorized representative                                        | 1931 (0.18)               | 2; 42      | 1.01 [0.62-1.67]        | 0.71     | 0.96               | 1496 (0.44)          | 1; 35     | 1.00 [0.60-1.67]        | 0.73     | 0.98               | 437 (0.06)         | 1; 7      | 1.34 [0.68-3.84]        | 0.55     | 0.67               |
| Rural craftsman (e.g., mason,<br>mechanics)                                                 | 7701 (0.71)               | 0; 5       | <b>0.03 [0.01-0.09]</b> | < 0.0001 | <b>&lt; 0.0001</b> | 283 (0.08)           | 0         | NC                      | NC       | NC                 | 7418 (0.99)        | 0; 5      | <b>0.03 [0.01-0.10]</b> | < 0.0001 | <b>&lt; 0.0001</b> |

Note: HR: hazard ratio, n: number of exposed farm managers, m: range of the number of exposed depression cases, NC: not calculated, p: p-value, p.adj: p-value adjusted using the Benjamini-Hochberg approach. Hazard ratios were estimated by Cox models with time to first depression insurance declaration or first antidepressant prescription as the underlying timescale, when the number of exposed cases was sufficient ( $m \geq 3$ ), adjusted for sex (both sexes only), age, first year of the farm's establishment, the number of working years, and the number of pre-existing comorbidities. Results for females and males were obtained with subgroup analysis (one separate model for each sex).

## STROBE Statement Checklist

|                           | Item No | Recommendation                                                                                                                                                                                                 | Page                                |
|---------------------------|---------|----------------------------------------------------------------------------------------------------------------------------------------------------------------------------------------------------------------|-------------------------------------|
| <b>Title and abstract</b> | 1       | (a) Indicate the study's design with a commonly used term in the title or the abstract                                                                                                                         | 1, 3, 4                             |
|                           |         | (b) Provide in the abstract an informative and balanced summary of what was done and what was found                                                                                                            | 3, 4                                |
| <b>Introduction</b>       |         |                                                                                                                                                                                                                |                                     |
| Background/rationale      | 2       | Explain the scientific background and rationale for the investigation being reported                                                                                                                           | 6                                   |
| Objectives                | 3       | State specific objectives, including any prespecified hypotheses                                                                                                                                               | 6                                   |
| <b>Methods</b>            |         |                                                                                                                                                                                                                |                                     |
| Study design              | 4       | Present key elements of study design early in the paper                                                                                                                                                        | 7, 8                                |
| Setting                   | 5       | Describe the setting, locations, and relevant dates, including periods of recruitment, exposure, follow-up, and data collection                                                                                | 7, 8                                |
| Participants              | 6       | (a) Give the eligibility criteria, and the sources and methods of selection of participants. Describe methods of follow-up                                                                                     | 7, 8                                |
|                           |         | (b) For matched studies, give matching criteria and number of exposed and unexposed                                                                                                                            | DNA                                 |
| Variables                 | 7       | Clearly define all outcomes, exposures, predictors, potential confounders, and effect modifiers. Give diagnostic criteria, if applicable                                                                       | 7-10, Table 1                       |
| Data sources/ measurement | 8*      | For each variable of interest, give sources of data and details of methods of assessment (measurement). Describe comparability of assessment methods if there is more than one group                           | 7-10, Table 1                       |
| Bias                      | 9       | Describe any efforts to address potential sources of bias                                                                                                                                                      | 7-10                                |
| Study size                | 10      | Explain how the study size was arrived at                                                                                                                                                                      | 7                                   |
| Quantitative variables    | 11      | Explain how quantitative variables were handled in the analyses. If applicable, describe which groupings were chosen and why                                                                                   | 8-10, Table 1                       |
| Statistical methods       | 12      | (a) Describe all statistical methods, including those used to control for confounding                                                                                                                          | 8-10                                |
|                           |         | (b) Describe any methods used to examine subgroups and interactions                                                                                                                                            | 8-10                                |
|                           |         | (c) Explain how missing data were addressed                                                                                                                                                                    | 7                                   |
|                           |         | (d) If applicable, explain how loss to follow-up was addressed                                                                                                                                                 | DNA                                 |
|                           |         | (e) Describe any sensitivity analyses                                                                                                                                                                          | 9, 10                               |
| <b>Results</b>            |         |                                                                                                                                                                                                                |                                     |
| Participants              | 13*     | (a) Report numbers of individuals at each stage of study-e.g., numbers potentially eligible, examined for eligibility, confirmed eligible, included in the study, and analyzed                                 | 10, 11, Table 2                     |
|                           |         | (b) Give reasons for non-participation at each stage                                                                                                                                                           | DNA                                 |
|                           |         | (c) Consider use of a flow diagram                                                                                                                                                                             | DNA                                 |
| Descriptive data          | 14*     | (a) Give characteristics of study participants (e.g., demographic, clinical, social) and information on exposures and potential confounders                                                                    | 10, Table 2                         |
|                           |         | (b) Indicate number of participants with missing data for each variable of interest                                                                                                                            | 10, Table 2                         |
|                           |         | (c) Summarize follow-up time (e.g., average and total amount)                                                                                                                                                  | 10                                  |
| Outcome data              | 15*     | Report numbers of outcome events or summary measures over time                                                                                                                                                 | 11, 12, Table 3                     |
| Main results              | 16      | (a) Give unadjusted estimates and, if applicable, confounder-adjusted estimates and their precision (e.g., 95% confidence interval). Make clear which confounders were adjusted for and why they were included | Table 3, and Tables S3 to S7        |
|                           |         | (b) Report category boundaries when continuous variables were categorized                                                                                                                                      | DNA                                 |
|                           |         | (c) If relevant, consider translating estimates of relative risk into absolute risk for a meaningful time period                                                                                               | DNA                                 |
| Other analyses            | 17      | Report other analyses done-e.g., analyses of subgroups and interactions, and sensitivity analyses                                                                                                              | 11-13, Table 3, and Tables S3 to S7 |
| <b>Discussion</b>         |         |                                                                                                                                                                                                                |                                     |
| Key results               | 18      | Summarize key results with reference to study objectives                                                                                                                                                       | 13, 14                              |
| Limitations               | 19      | Discuss limitations of the study, taking into account sources of potential bias or imprecision. Discuss both direction and magnitude of any potential bias                                                     | 16-19                               |
| Interpretation            | 20      | Give a cautious overall interpretation of results considering objectives, limitations, multiplicity of analyses, results from similar studies, and other relevant evidence                                     | 16-19                               |
| Generalizability          | 21      | Discuss the generalizability (external validity) of the study results                                                                                                                                          | 18                                  |
| <b>Other information</b>  |         |                                                                                                                                                                                                                |                                     |
| Funding                   | 22      | Give the source of funding and the role of the funders for the present study and, if applicable, for the original study on which the present article is based                                                  | 4, 10, 20, 21                       |

\*Give information separately for exposed and unexposed groups.

DNA: does not applied.
