# Supplementary material for: Agricultural activities and risk of treatment for depressive disorders among the entire French agricultural workforce: the TRACTOR project, a nationwide retrospective cohort study
Source: PubMed Central journal article supplement (PMC10318497; doi:10.1016/j.lanepe.2023.100674), 2023-06-26
Supplement: mmc3.pdf [file mmc3.pdf]

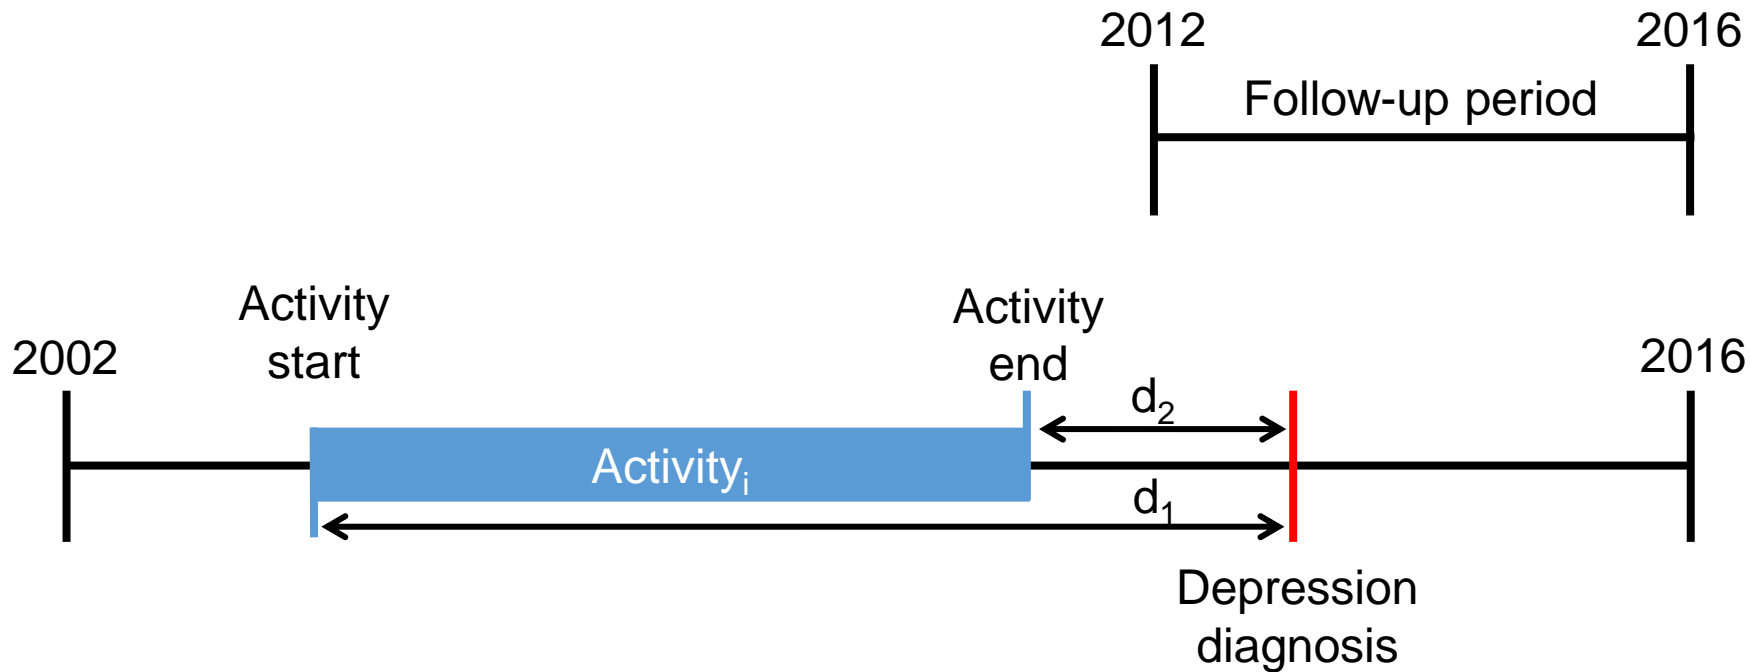

**Depression considered as work-related if:**

- $d_1 > 0$  year and  $d_2 \leq 2$  years  $\rightarrow$  for the main analysis, and sensitivity analyses 1, 3 and 4
- $d_1 > 0$  year  $\rightarrow$  for sensitivity analysis 2
