# Supplementary material for: Agricultural activities and risk of treatment for depressive disorders among the entire French agricultural workforce: the TRACTOR project, a nationwide retrospective cohort study
Source: PubMed Central journal article supplement (PMC10318497; doi:10.1016/j.lanepe.2023.100674), 2023-06-26

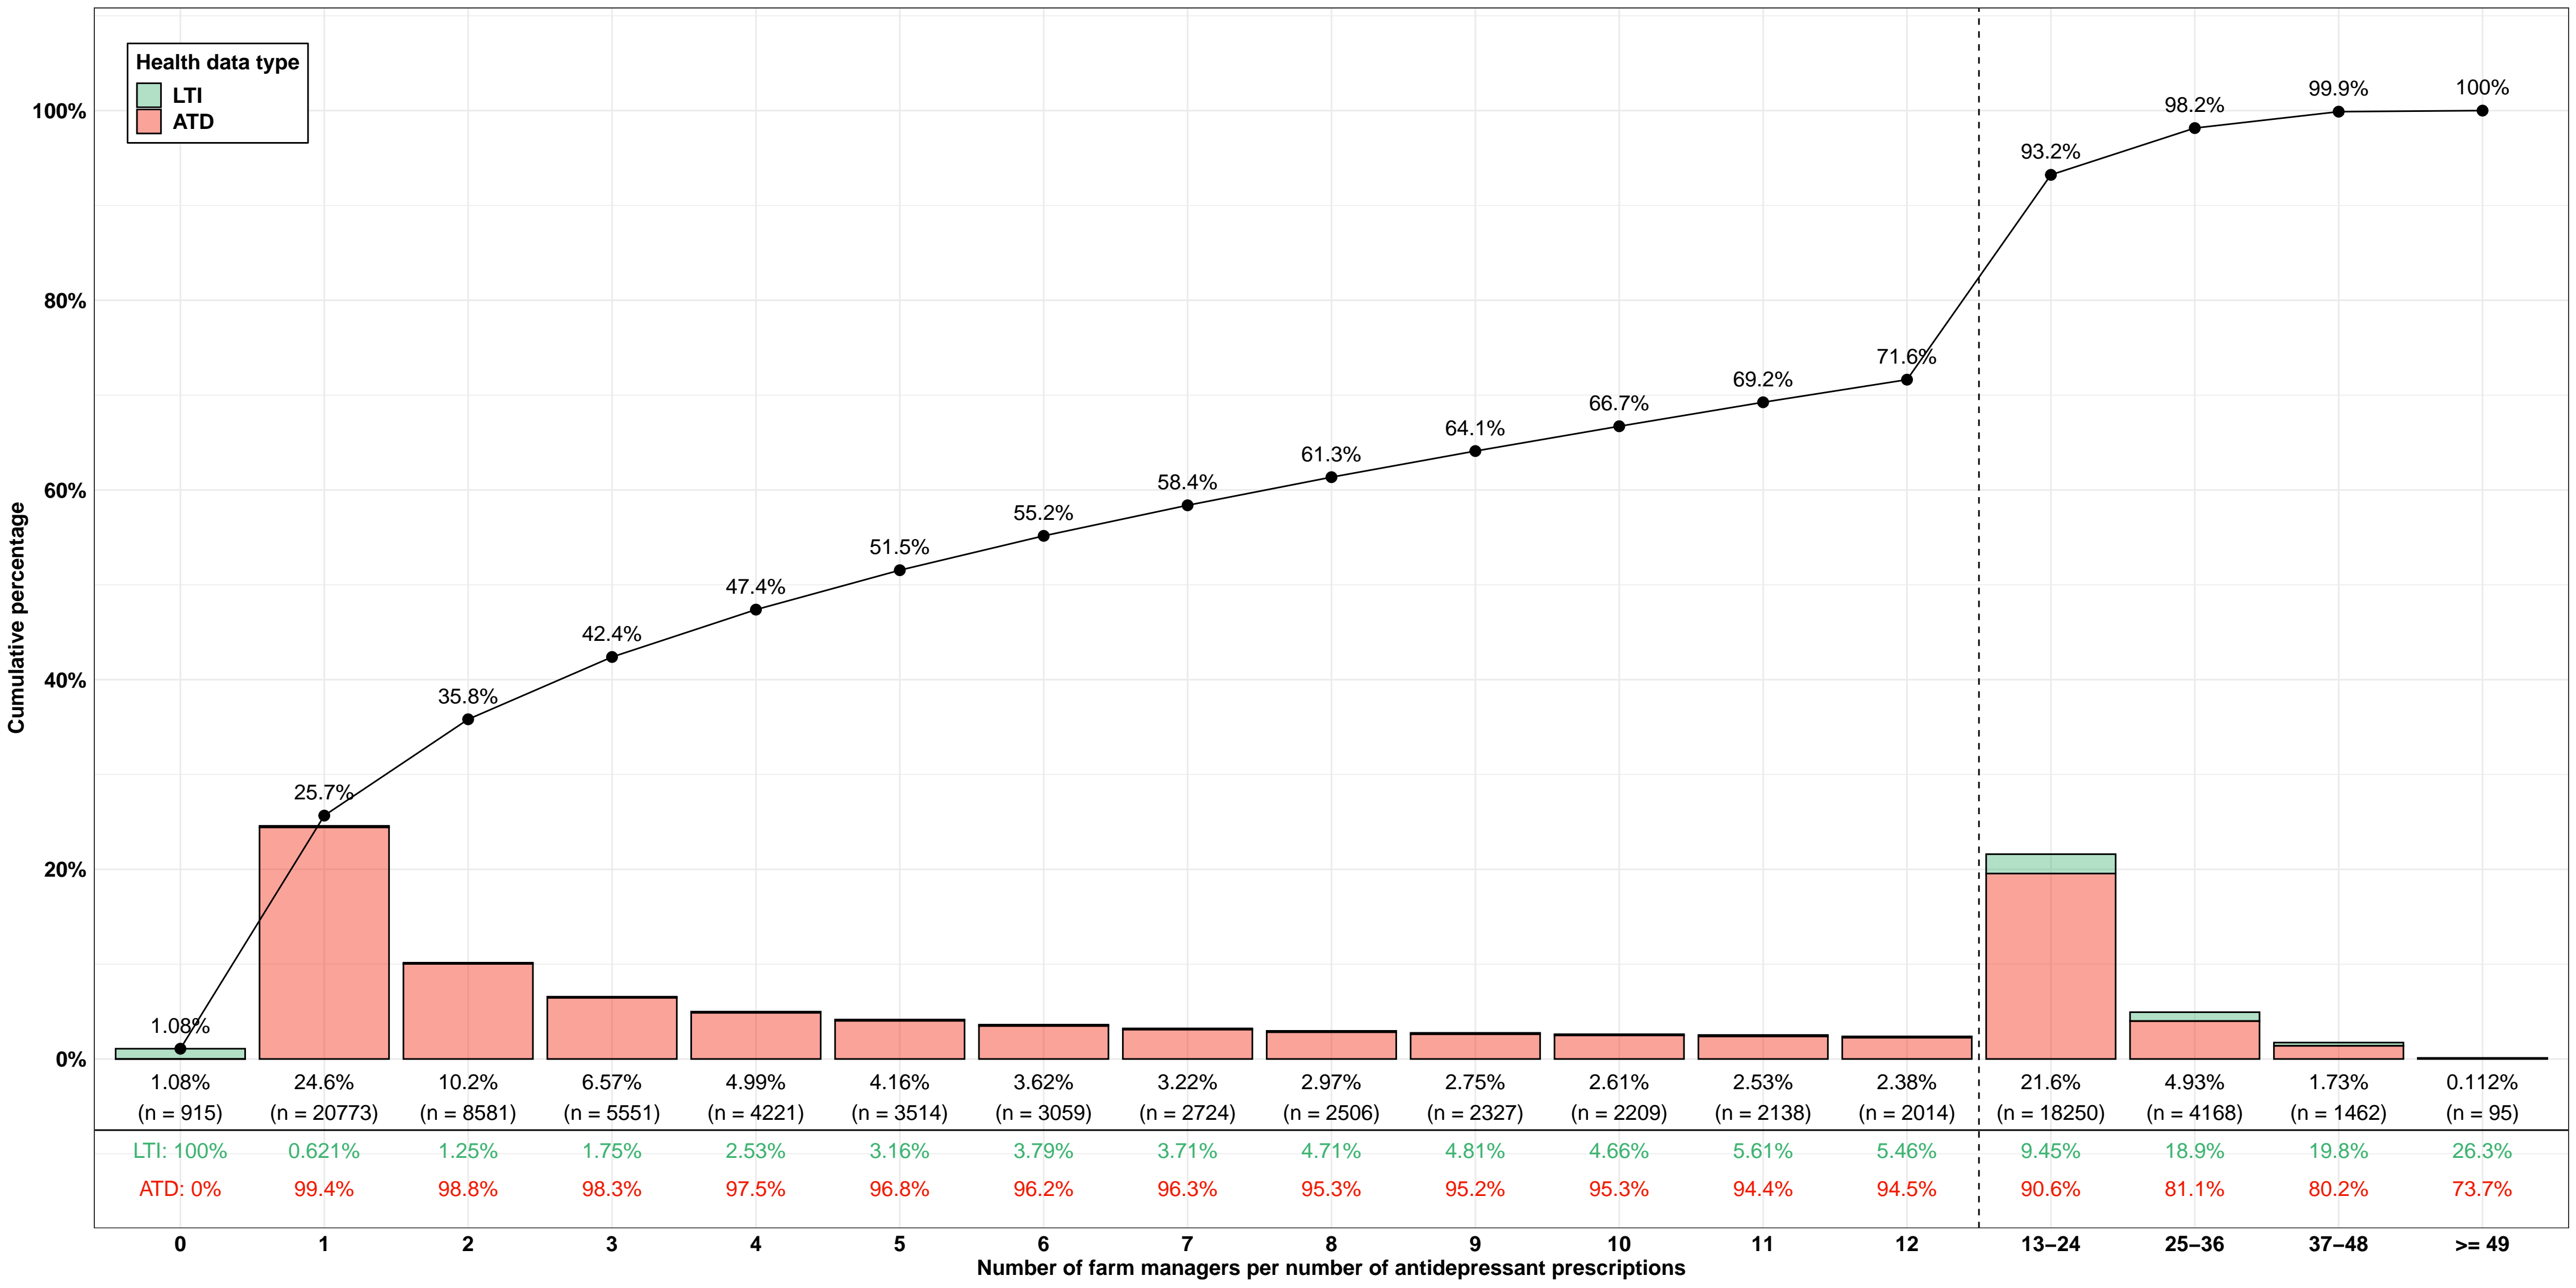

Supplement: mmc4.pdf [file mmc4.pdf]
